# Supplementary material for: The conformational preferences of polychlorocyclohexanes
Source: Royal Society of Chemistry journal article supplement (doi:10.1039/c9nj02997d), 2019-01-01
Supplement: c9nj02997d1.pdf [file c9nj02997d1.pdf]

*For being published in New Journal of Chemistry*

## **The Conformational Preferences of Polychlorocyclohexanes**

Shida Gong,<sup>a, b</sup> Yuan Chen,<sup>a</sup> Qiong Luo,<sup>a\*</sup> Henry F. Schaefer<sup>c\*</sup>

<sup>a</sup> MOE Key Laboratory of Theoretical Chemistry of Environment, Center for Computational Quantum Chemistry, South China Normal University, Guangzhou 510631, P. R. China

<sup>b</sup> School of Chemistry and Chemical Engineering, Qingdao University, Qingdao 266071, P. R. China

<sup>c</sup> Center for Computational Chemistry, University of Georgia, Athens, GA 30602, USA

**Table S1-S10** Dipole moments of polychlorocyclohexane conformers in Debye at the MP2/cc-pVTZ level of theory, using the geometries optimized at MP2/DZP level of theory.

**Table S11-S102** Optimized cartesian coordinates and total energies of cyclohexane and polychlorocyclohexane.

**Table S1** Dipole moments of chlorocyclohexane conformers in Debye at the MP2/cc-pVTZ level of theory, using the geometries optimized at MP2/DZP level of theory.

| Species           | Structure                                                                         | Dipole Moment |
|-------------------|-----------------------------------------------------------------------------------|---------------|
| Chlorocyclohexane |  | 2.60          |
|                   |  | 2.25          |

**Table 2** Dipole moments of dichlorocyclohexane conformers in Debye at the MP2/cc-pVTZ level of theory, using the geometries optimized at the MP2/DZP level of theory.

| Species            | Structure                                                                           | Dipole Moment |
|--------------------|-------------------------------------------------------------------------------------|---------------|
| <i>trans</i> -1, 2 |    | 1.07          |
|                    |    | 3.86          |
| <i>cis</i> -1, 2   |  | 3.48          |
| <i>cis</i> -1, 3   |  | 2.69          |
|                    |  | 4.03          |
| <i>trans</i> -1, 3 |  | 2.67          |
| <i>trans</i> -1, 4 |  | 0.00          |
|                    |  | 0.00          |
| <i>cis</i> -1, 4   |  | 3.21          |

**Table S3** Dipole moments of 1, 2, 3-trichlorocyclohexane in Debye at the MP2/cc-pVTZ level of theory, using the geometries optimized at the MP2/DZP level of theory.

| Species                               | Structure                                                                           | Dipole Moment |
|---------------------------------------|-------------------------------------------------------------------------------------|---------------|
| <i>r</i> -1, <i>c</i> -2, <i>c</i> -3 |    | 3.59          |
|                                       |    | 4.72          |
| <i>r</i> -1, <i>t</i> -2, <i>c</i> -3 |    | 4.13          |
|                                       |    | 2.26          |
| <i>r</i> -1, <i>t</i> -2, <i>t</i> -3 |   | 2.45          |
|                                       |  | 3.98          |

**Table S4** Dipole moments of 1, 2, 4-trichlorocyclohexane in Debye at the MP2/cc-pVTZ level of theory, using the geometries optimized at the MP2/DZP level of theory.

| Species                               | Structure                                                                           | Dipole Moment |
|---------------------------------------|-------------------------------------------------------------------------------------|---------------|
| <i>r</i> -1, <i>c</i> -2, <i>c</i> -4 |    | 3.46          |
|                                       |    | 4.39          |
| <i>r</i> -1, <i>t</i> -2, <i>c</i> -4 |    | 1.72          |
|                                       |    | 3.81          |
| <i>r</i> -1, <i>c</i> -2, <i>t</i> -4 |   | 2.19          |
|                                       |  | 1.66          |
| <i>r</i> -1, <i>t</i> -2, <i>t</i> -4 |  | 2.12          |
|                                       |  | 1.90          |

**Table S5** Dipole moments of 1, 3, 5-trichlorocyclohexane in Debye at the MP2/cc-pVTZ level of theory, using the geometries optimized at the MP2/DZP level of theory.

| Species                               | Structure                                                                         | Dipole Moment |
|---------------------------------------|-----------------------------------------------------------------------------------|---------------|
| <i>r</i> -1, <i>c</i> -3, <i>c</i> -5 |  | 1.61          |
|                                       |  | 5.59          |
| <i>r</i> -1, <i>c</i> -3, <i>t</i> -5 |  | 1.94          |
|                                       |  | 3.80          |

**Table S6** Dipole moments of 1, 2, 3, 4-tetrachlorocyclohexane in Debye at the MP2/cc-pVTZ level of theory, using the geometries optimized at the MP2/DZP level of theory.

| Species                                            | Structure                                                                           | Dipole Moment |
|----------------------------------------------------|-------------------------------------------------------------------------------------|---------------|
| <i>r</i> -1, <i>t</i> -2, <i>c</i> -3, <i>t</i> -4 |    | 3.25          |
|                                                    |    | 1.04          |
| <i>r</i> -1, <i>t</i> -2, <i>c</i> -3, <i>c</i> -4 |    | 4.25          |
|                                                    |    | 2.67          |
| <i>r</i> -1, <i>t</i> -2, <i>t</i> -3, <i>t</i> -4 |   | 2.74          |
|                                                    |  | 2.95          |
| <i>r</i> -1, <i>c</i> -2, <i>t</i> -3, <i>t</i> -4 |  | 0.88          |
|                                                    |  | 3.37          |
| <i>r</i> -1, <i>c</i> -2, <i>c</i> -3, <i>c</i> -4 |  | 4.51          |
| <i>r</i> -1, <i>t</i> -2, <i>t</i> -3, <i>c</i> -4 |  | 3.17          |

**Table S7** Dipole moments of 1, 2, 3, 5-tetrachlorocyclohexane in Debye at the MP2/cc-pVTZ level of theory, using the geometries optimized at the MP2/DZP level of theory.

| Species                                            | Structure                                                                           | Dipole Moment |
|----------------------------------------------------|-------------------------------------------------------------------------------------|---------------|
| <i>r</i> -1, <i>t</i> -2, <i>c</i> -3, <i>c</i> -5 |    | 1.94          |
|                                                    |    | 3.50          |
| <i>r</i> -1, <i>t</i> -2, <i>c</i> -3, <i>t</i> -5 |    | 3.70          |
|                                                    |    | 1.74          |
| <i>r</i> -1, <i>t</i> -2, <i>t</i> -3, <i>c</i> -5 |    | 1.92          |
|                                                    |   | 2.48          |
| <i>r</i> -1, <i>t</i> -2, <i>t</i> -3, <i>t</i> -5 |  | 1.66          |
|                                                    |  | 4.47          |
| <i>r</i> -1, <i>c</i> -2, <i>c</i> -3, <i>c</i> -5 |  | 2.90          |
|                                                    |  | 5.71          |
| <i>r</i> -1, <i>c</i> -2, <i>c</i> -3, <i>t</i> -5 |  | 1.96          |
|                                                    |  | 3.27          |

**Table S8** Dipole moments of 1, 2, 4, 5-tetrachlorocyclohexane in Debye at the MP2/cc-pVTZ level of theory, using the geometries optimized at the MP2/DZP level of theory.

| Species                                            | Structure                                                                           | Dipole Moment |
|----------------------------------------------------|-------------------------------------------------------------------------------------|---------------|
| <i>r</i> -1, <i>t</i> -2, <i>t</i> -4, <i>c</i> -5 |    | 0.00          |
|                                                    |    | 0.00          |
| <i>r</i> -1, <i>t</i> -2, <i>t</i> -4, <i>t</i> -5 |    | 2.63          |
|                                                    |    | 2.53          |
| <i>r</i> -1, <i>t</i> -2, <i>c</i> -4, <i>t</i> -5 |    | 2.72          |
| <i>r</i> -1, <i>c</i> -2, <i>t</i> -4, <i>t</i> -5 |   | 0.00          |
| <i>r</i> -1, <i>c</i> -2, <i>c</i> -4, <i>c</i> -5 |  | 4.32          |

**Table S9** Dipole moments of 1, 2, 3, 4, 5-pentachlorocyclohexane in Debye at the MP2/cc-pVTZ level of theory, using the geometries optimized at the MP2/DZP level of theory.

| Species                                                         | Structure                                                                           | Dipole Moment |
|-----------------------------------------------------------------|-------------------------------------------------------------------------------------|---------------|
| <i>r</i> -1, <i>t</i> -2, <i>c</i> -3, <i>t</i> -4, <i>c</i> -5 |    | 1.66          |
|                                                                 |    | 1.73          |
| <i>r</i> -1, <i>t</i> -2, <i>c</i> -3, <i>t</i> -4, <i>t</i> -5 |    | 3.17          |
|                                                                 |    | 1.29          |
| <i>r</i> -1, <i>t</i> -2, <i>c</i> -3, <i>c</i> -4, <i>c</i> -5 |   | 2.67          |
|                                                                 |  | 3.76          |
| <i>r</i> -1, <i>t</i> -2, <i>c</i> -3, <i>c</i> -4, <i>t</i> -5 |  | 3.10          |
|                                                                 |  | 2.82          |
| <i>r</i> -1, <i>t</i> -2, <i>t</i> -3, <i>t</i> -4, <i>c</i> -5 |  | 1.05          |
|                                                                 |  | 1.96          |
| <i>r</i> -1, <i>t</i> -2, <i>t</i> -3, <i>t</i> -4, <i>t</i> -5 |  | 2.56          |
|                                                                 |  | 3.65          |

Table S9, continued

|                                                                 |                                                                                     |      |
|-----------------------------------------------------------------|-------------------------------------------------------------------------------------|------|
| <i>r</i> -1, <i>t</i> -2, <i>t</i> -3, <i>c</i> -4, <i>c</i> -5 |    | 1.40 |
|                                                                 |    | 3.36 |
| <i>r</i> -1, <i>c</i> -2, <i>c</i> -3, <i>t</i> -4, <i>t</i> -5 |    | 1.72 |
|                                                                 |    | 1.66 |
| <i>r</i> -1, <i>c</i> -2, <i>c</i> -3, <i>c</i> -4, <i>c</i> -5 |    | 3.93 |
|                                                                 |   | 5.52 |
| <i>r</i> -1, <i>c</i> -2, <i>t</i> -3, <i>c</i> -4, <i>c</i> -5 |  | 2.30 |
|                                                                 |  | 4.67 |

**Table S10** Dipole moments of 1, 2, 3, 4, 5, 6-hexachlorocyclohexane in Debye at the

MP2/cc-pVTZ level of theory, using the geometries optimized at the MP2/DZP level of theory.

| Species                                                                      | Structure                                                                           | Dipole Moment |
|------------------------------------------------------------------------------|-------------------------------------------------------------------------------------|---------------|
| <i>r</i> -1, <i>t</i> -2, <i>c</i> -3, <i>t</i> -4, <i>c</i> -5, <i>t</i> -6 |    | 0.00          |
|                                                                              |    | 0.00          |
| <i>r</i> -1, <i>t</i> -2, <i>c</i> -3, <i>t</i> -4, <i>c</i> -5, <i>c</i> -6 |    | 2.09          |
|                                                                              |    | 2.03          |
| <i>r</i> -1, <i>t</i> -2, <i>c</i> -3, <i>t</i> -4, <i>t</i> -5, <i>c</i> -6 |    | 2.38          |
|                                                                              |   | 2.27          |
| <i>r</i> -1, <i>t</i> -2, <i>c</i> -3, <i>c</i> -4, <i>c</i> -5, <i>c</i> -6 |  | 3.55          |
|                                                                              |  | 3.50          |
| <i>r</i> -1, <i>t</i> -2, <i>t</i> -3, <i>t</i> -4, <i>c</i> -5, <i>c</i> -6 |  | 0.00          |
|                                                                              |  | 0.00          |
| <i>r</i> -1, <i>t</i> -2, <i>c</i> -3, <i>c</i> -4, <i>t</i> -5, <i>c</i> -6 |  | 3.01          |
| <i>r</i> -1, <i>t</i> -2, <i>t</i> -3, <i>t</i> -4, <i>t</i> -5, <i>c</i> -6 |  | 2.18          |
| <i>r</i> -1, <i>c</i> -2, <i>c</i> -3, <i>c</i> -4, <i>c</i> -5, <i>c</i> -6 |  | 5.02          |

**Table S11** Optimized cartesian coordinates and total energies of chair-cyclohexane.

| chair-cyclohexane                                   |           |           |           |
|-----------------------------------------------------|-----------|-----------|-----------|
| $E(\text{MP2/cc-pVTZ}) = -235.1019231 \text{ a.u.}$ |           |           |           |
| Atom                                                | X         | Y         | Z         |
| C                                                   | -1.264091 | 0.729824  | 0.236334  |
| C                                                   | 0.000000  | 1.459647  | -0.236334 |
| C                                                   | 1.264091  | 0.729824  | 0.236334  |
| C                                                   | 1.264091  | -0.729824 | -0.236334 |
| C                                                   | 0.000000  | -1.459647 | 0.236334  |
| C                                                   | -1.264091 | -0.729824 | -0.236334 |
| H                                                   | 2.160223  | 1.247206  | -0.126951 |
| H                                                   | 0.000000  | 1.501759  | -1.333880 |
| H                                                   | 0.000000  | 2.494411  | 0.126951  |
| H                                                   | 1.300561  | -0.750879 | -1.333880 |
| H                                                   | 2.160223  | -1.247206 | 0.126951  |
| H                                                   | 0.000000  | -2.494411 | -0.126951 |
| H                                                   | 0.000000  | -1.501759 | 1.333880  |
| H                                                   | -1.300561 | -0.750879 | -1.333880 |
| H                                                   | -2.160223 | -1.247206 | 0.126951  |
| H                                                   | 1.300561  | 0.750879  | 1.333880  |
| H                                                   | -2.160223 | 1.247206  | -0.126951 |
| H                                                   | -1.300561 | 0.750879  | 1.333880  |

**Table S12** Optimized cartesian coordinates and total energies of axial-chlorocyclohexane.

| axial-chlorocyclohexane                             |           |           |           |
|-----------------------------------------------------|-----------|-----------|-----------|
| $E(\text{MP2/cc-pVTZ}) = -694.4514077 \text{ a.u.}$ |           |           |           |
| Atom                                                | X         | Y         | Z         |
| C                                                   | 0.031857  | -1.085146 | 0.000000  |
| C                                                   | -0.607631 | -0.510291 | 1.265550  |
| C                                                   | -0.607631 | 1.022572  | 1.265792  |
| C                                                   | -1.281527 | 1.567624  | 0.000000  |
| C                                                   | -0.607631 | 1.022572  | -1.265792 |
| C                                                   | -0.607631 | -0.510291 | -1.265550 |
| H                                                   | -1.128822 | 1.387179  | 2.158213  |
| H                                                   | -1.645538 | -0.870139 | 1.293777  |
| H                                                   | -0.096301 | -0.904203 | 2.150355  |
| H                                                   | -2.338918 | 1.269040  | 0.000000  |
| H                                                   | -1.255567 | 2.663639  | 0.000000  |
| H                                                   | -1.128822 | 1.387179  | -2.158213 |
| H                                                   | 0.423818  | 1.388174  | -1.318603 |
| H                                                   | -1.645538 | -0.870139 | -1.293777 |
| H                                                   | -0.096301 | -0.904203 | -2.150355 |
| H                                                   | 0.423818  | 1.388174  | 1.318603  |
| Cl                                                  | 1.801437  | -0.752976 | 0.000000  |
| H                                                   | -0.055091 | -2.176358 | 0.000000  |

**Table S13** Optimized cartesian coordinates and total energies of equatorial-chlorocyclohexane.

| equatorial-chlorocyclohexane                        |           |           |           |
|-----------------------------------------------------|-----------|-----------|-----------|
| $E(\text{MP2/cc-pVTZ}) = -694.4518085 \text{ a.u.}$ |           |           |           |
| Atom                                                | X         | Y         | Z         |
| C                                                   | -0.506770 | 0.514161  | 0.000000  |
| C                                                   | 0.171625  | -0.013422 | 1.262086  |
| C                                                   | 0.171625  | -1.548763 | 1.261276  |
| C                                                   | 0.848338  | -2.098566 | 0.000000  |
| C                                                   | 0.171625  | -1.548763 | -1.261276 |
| C                                                   | 0.171625  | -0.013422 | -1.262086 |
| H                                                   | 0.677899  | -1.916985 | 2.160916  |
| H                                                   | 1.203589  | 0.358104  | 1.286040  |
| H                                                   | -0.340095 | 0.374010  | 2.149721  |
| H                                                   | -1.559669 | 0.207994  | 0.000000  |
| H                                                   | 1.905427  | -1.801800 | 0.000000  |
| H                                                   | 0.818168  | -3.194297 | 0.000000  |
| H                                                   | 0.677899  | -1.916985 | -2.160916 |
| H                                                   | -0.863794 | -1.912154 | -1.302779 |
| H                                                   | 1.203589  | 0.358104  | -1.286040 |
| H                                                   | -0.340095 | 0.374010  | -2.149721 |
| H                                                   | -0.863794 | -1.912154 | 1.302779  |
| Cl                                                  | -0.511032 | 2.307930  | 0.000000  |

**Table S14** Optimized cartesian coordinates and total energies of *trans*-1ax, 2ax - dichlorocyclohexane.

| <i>trans</i> -1ax, 2ax                               |           |           |           |
|------------------------------------------------------|-----------|-----------|-----------|
| $E(\text{MP2/cc-pVTZ}) = -1153.5720327 \text{ a.u.}$ |           |           |           |
| atom                                                 | X         | Y         | Z         |
| C                                                    | -0.727470 | 0.243910  | -0.678784 |
| C                                                    | 0.727470  | -0.243910 | -0.678784 |
| C                                                    | 1.473807  | 0.141086  | 0.598531  |
| C                                                    | 0.712778  | -0.283078 | 1.859569  |
| C                                                    | -0.712778 | 0.283078  | 1.859569  |
| C                                                    | -1.473807 | -0.141086 | 0.598531  |
| H                                                    | 2.472238  | -0.307279 | 0.575829  |
| H                                                    | 1.241842  | 0.150565  | -1.559730 |
| H                                                    | -1.241842 | -0.150565 | -1.559730 |
| H                                                    | 0.673374  | -1.376817 | 1.914004  |
| H                                                    | 1.255613  | 0.067069  | 2.744499  |
| H                                                    | -1.255613 | -0.067069 | 2.744499  |
| H                                                    | -0.673374 | 1.376817  | 1.914004  |
| H                                                    | -1.597603 | -1.230221 | 0.594310  |
| H                                                    | -2.472238 | 0.307279  | 0.575829  |
| H                                                    | 1.597603  | 1.230221  | 0.594310  |
| Cl                                                   | -0.712778 | 2.030393  | -0.879106 |
| Cl                                                   | 0.712778  | -2.030393 | -0.879106 |

**Table S15** Optimized cartesian coordinates and total energies of *cis*-1ax, 2eq -

dichlorocyclohexane.

| <i>cis-1ax, 2eq</i>                                  |           |           |           |
|------------------------------------------------------|-----------|-----------|-----------|
| $E(\text{MP2/cc-pVTZ}) = -1153.5698586 \text{ a.u.}$ |           |           |           |
| atom                                                 | X         | Y         | Z         |
| C                                                    | 0.058634  | 0.685719  | 0.739139  |
| C                                                    | -0.579569 | -0.669597 | 0.425106  |
| C                                                    | 0.114516  | -1.382466 | -0.731195 |
| C                                                    | 1.605005  | -1.565403 | -0.407615 |
| C                                                    | 2.282141  | -0.229408 | -0.078251 |
| C                                                    | 1.545318  | 0.490200  | 1.056995  |
| H                                                    | -0.361611 | -2.355211 | -0.890672 |
| H                                                    | -0.457611 | 1.142104  | 1.589320  |
| H                                                    | 1.704255  | -2.241233 | 0.452521  |
| H                                                    | 2.107071  | -2.047714 | -1.253884 |
| H                                                    | 3.323697  | -0.400580 | 0.215049  |
| H                                                    | 2.294174  | 0.407972  | -0.968583 |
| H                                                    | 1.612413  | -0.110619 | 1.974263  |
| H                                                    | 1.998759  | 1.464495  | 1.266372  |
| H                                                    | -0.011262 | -0.794548 | -1.645893 |
| Cl                                                   | -0.128190 | 1.834023  | -0.621424 |
| Cl                                                   | -2.336440 | -0.526074 | 0.145098  |
| H                                                    | -0.467451 | -1.274068 | 1.333980  |

**Table S16** Optimized cartesian coordinates and total energies of *trans-1eq, 2eq* - dichlorocyclohexane.

| <i>trans-1eq, 2eq</i>                                |           |           |           |
|------------------------------------------------------|-----------|-----------|-----------|
| $E(\text{MP2/cc-pVTZ}) = -1153.5701824 \text{ a.u.}$ |           |           |           |
| atom                                                 | X         | Y         | Z         |
| C                                                    | -0.006527 | 0.764389  | -0.171600 |
| C                                                    | 0.006527  | -0.764389 | -0.171600 |
| C                                                    | 0.675629  | -1.302225 | 1.096161  |
| C                                                    | -0.006527 | -0.765365 | 2.358568  |
| C                                                    | 0.006527  | 0.765365  | 2.358568  |
| C                                                    | -0.675629 | 1.302225  | 1.096161  |
| H                                                    | 0.649862  | -2.396588 | 1.071178  |
| H                                                    | -1.044700 | -1.119974 | 2.396593  |
| H                                                    | 0.503189  | -1.157366 | 3.245711  |
| H                                                    | -0.503189 | 1.157366  | 3.245711  |
| H                                                    | 1.044700  | 1.119974  | 2.396593  |
| H                                                    | -1.730386 | 1.000700  | 1.089193  |
| H                                                    | -0.649862 | 2.396588  | 1.071178  |
| H                                                    | 1.730386  | -1.000700 | 1.089193  |
| Cl                                                   | 0.862655  | -1.405965 | -1.603907 |
| H                                                    | -1.027403 | -1.122882 | -0.235031 |
| H                                                    | 1.027403  | 1.122882  | -0.235031 |
| Cl                                                   | -0.862655 | 1.405965  | -1.603907 |

**Table S17** Optimized cartesian coordinates and total energies of *cis-1ax, 3ax* -

dichlorocyclohexane.

| <i>cis-1ax, 3ax</i>                                  |           |           |           |
|------------------------------------------------------|-----------|-----------|-----------|
| $E(\text{MP2/cc-pVTZ}) = -1153.5665204 \text{ a.u.}$ |           |           |           |
| atom                                                 | X         | Y         | Z         |
| C                                                    | 0.426493  | 0.571625  | 1.299612  |
| C                                                    | 1.185558  | 0.864758  | 0.000000  |
| C                                                    | 0.426493  | 0.571625  | -1.299612 |
| C                                                    | -1.008791 | 1.099563  | -1.253372 |
| C                                                    | -1.751297 | 0.629108  | 0.000000  |
| C                                                    | -1.008791 | 1.099563  | 1.253372  |
| H                                                    | 0.966277  | 1.050057  | -2.122605 |
| H                                                    | 1.383452  | 1.946395  | 0.000000  |
| H                                                    | 2.152819  | 0.353198  | 0.000000  |
| H                                                    | 0.966277  | 1.050057  | 2.122605  |
| H                                                    | -0.955773 | 2.197518  | -1.244114 |
| H                                                    | -1.537235 | 0.800942  | -2.164260 |
| H                                                    | -2.767065 | 1.038692  | 0.000000  |
| H                                                    | -1.834482 | -0.462267 | 0.000000  |
| H                                                    | -0.955773 | 2.197518  | 1.244114  |
| H                                                    | -1.537235 | 0.800942  | 2.164260  |
| Cl                                                   | 0.426493  | -1.176191 | 1.708528  |
| Cl                                                   | 0.426493  | -1.176191 | -1.708528 |

**Table S18** Optimized cartesian coordinates and total energies of *trans-1ax, 3eq* - dichlorocyclohexane.

| <i>trans-1ax, 3eq</i>                                |           |           |           |
|------------------------------------------------------|-----------|-----------|-----------|
| $E(\text{MP2/cc-pVTZ}) = -1153.5728699 \text{ a.u.}$ |           |           |           |
| atom                                                 | X         | Y         | Z         |
| C                                                    | -1.288980 | -0.278882 | 0.813803  |
| C                                                    | 0.186452  | -0.675375 | 0.907330  |
| C                                                    | 0.994357  | -0.102383 | -0.255618 |
| C                                                    | 0.844382  | 1.414442  | -0.340457 |
| C                                                    | -0.634900 | 1.799461  | -0.482225 |
| C                                                    | -1.459551 | 1.234698  | 0.678668  |
| H                                                    | 0.586462  | -0.268397 | 1.845028  |
| H                                                    | 0.283576  | -1.764706 | 0.942612  |
| H                                                    | -1.818912 | -0.639604 | 1.700666  |
| H                                                    | 1.258059  | 1.858711  | 0.573804  |
| H                                                    | 1.425604  | 1.797697  | -1.185874 |
| H                                                    | -0.728191 | 2.890542  | -0.504303 |
| H                                                    | -1.028027 | 1.420824  | -1.431965 |
| H                                                    | -1.115062 | 1.685105  | 1.619567  |
| H                                                    | -2.520538 | 1.478145  | 0.562023  |
| Cl                                                   | -2.063622 | -1.115082 | -0.578627 |
| Cl                                                   | 2.718960  | -0.546753 | -0.060000 |
| H                                                    | 0.665735  | -0.558888 | -1.193913 |

**Table S19** Optimized cartesian coordinates and total energies of *cis-1eq, 3eq* -

dichlorocyclohexane.

| <i>cis</i> -1eq, 3eq                         |           |           |           |
|----------------------------------------------|-----------|-----------|-----------|
| $E(\text{MP2/cc-pVTZ}) = -1153.5723147$ a.u. |           |           |           |
| atom                                         | X         | Y         | Z         |
| C                                            | -0.329756 | -0.192132 | 1.250907  |
| C                                            | 0.358664  | -0.739568 | 0.000000  |
| C                                            | -0.329756 | -0.192132 | -1.250907 |
| C                                            | -0.329756 | 1.334062  | -1.266308 |
| C                                            | -1.010595 | 1.870299  | 0.000000  |
| C                                            | -0.329756 | 1.334062  | 1.266308  |
| H                                            | 1.409722  | -0.428476 | 0.000000  |
| H                                            | 0.329716  | -1.833714 | 0.000000  |
| H                                            | 0.708324  | 1.685318  | -1.309027 |
| H                                            | -0.841390 | 1.697157  | -2.163782 |
| H                                            | -0.983674 | 2.965355  | 0.000000  |
| H                                            | -2.068122 | 1.575488  | 0.000000  |
| H                                            | 0.708324  | 1.685318  | 1.309027  |
| H                                            | -0.841390 | 1.697157  | 2.163782  |
| H                                            | -1.363880 | -0.555083 | 1.286949  |
| Cl                                           | 0.474470  | -0.835911 | 2.715842  |
| Cl                                           | 0.474470  | -0.835911 | -2.715842 |
| H                                            | -1.363880 | -0.555083 | -1.286949 |

**Table S20** Optimized cartesian coordinates and total energies of *trans*-1ax, 4ax - dichlorocyclohexane.

| <i>trans</i> -1ax, 4ax                       |           |           |           |
|----------------------------------------------|-----------|-----------|-----------|
| $E(\text{MP2/cc-pVTZ}) = -1153.5741937$ a.u. |           |           |           |
| atom                                         | X         | Y         | Z         |
| C                                            | -0.223436 | 1.464684  | 0.000000  |
| C                                            | 0.223436  | 0.732312  | 1.265951  |
| C                                            | -0.223436 | -0.732312 | 1.265951  |
| C                                            | 0.223436  | -1.464684 | 0.000000  |
| C                                            | -0.223436 | -0.732312 | -1.265951 |
| C                                            | 0.223436  | 0.732312  | -1.265951 |
| H                                            | 0.169052  | -1.247588 | 2.148090  |
| H                                            | 1.317813  | 0.782571  | 1.307870  |
| H                                            | -0.169052 | 1.247588  | 2.148090  |
| H                                            | 0.171906  | 2.485124  | 0.000000  |
| H                                            | -0.171906 | -2.485124 | 0.000000  |
| H                                            | 0.169052  | -1.247588 | -2.148090 |
| H                                            | -1.317813 | -0.782571 | -1.307870 |
| H                                            | 1.317813  | 0.782571  | -1.307870 |
| H                                            | -0.169052 | 1.247588  | -2.148090 |
| H                                            | -1.317813 | -0.782571 | 1.307870  |
| Cl                                           | -2.015639 | 1.650044  | 0.000000  |
| Cl                                           | 2.015639  | -1.650044 | 0.000000  |

**Table S21** Optimized cartesian coordinates and total energies of *cis*-1ax, 4eq -

dichlorocyclohexane.

| <i>cis-1ax, 4eq</i>                                  |           |           |           |
|------------------------------------------------------|-----------|-----------|-----------|
| $E(\text{MP2/cc-pVTZ}) = -1153.5730337 \text{ a.u.}$ |           |           |           |
| atom                                                 | X         | Y         | Z         |
| C                                                    | 0.297878  | -1.761583 | 0.000000  |
| C                                                    | -0.346115 | -1.187288 | 1.262772  |
| C                                                    | -0.346115 | 0.346669  | 1.263366  |
| C                                                    | -1.025690 | 0.869817  | 0.000000  |
| C                                                    | -0.346115 | 0.346669  | -1.263366 |
| C                                                    | -0.346115 | -1.187288 | -1.262772 |
| H                                                    | -0.872666 | 0.718480  | 2.148277  |
| H                                                    | -1.381561 | -1.553013 | 1.296038  |
| H                                                    | 0.167286  | -1.568840 | 2.151206  |
| H                                                    | 0.211430  | -2.852643 | 0.000000  |
| H                                                    | -0.872666 | 0.718480  | -2.148277 |
| H                                                    | 0.680143  | 0.725531  | -1.301600 |
| H                                                    | -1.381561 | -1.553013 | -1.296038 |
| H                                                    | 0.167286  | -1.568840 | -2.151206 |
| H                                                    | 0.680143  | 0.725531  | 1.301600  |
| Cl                                                   | 2.062958  | -1.420528 | 0.000000  |
| Cl                                                   | -1.042191 | 2.661071  | 0.000000  |
| H                                                    | -2.077245 | 0.557122  | 0.000000  |

**Table S22** Optimized cartesian coordinates and total energies of *trans-1eq, 4eq* - dichlorocyclohexane.

| <i>trans-1eq, 4eq</i>                                |           |           |           |
|------------------------------------------------------|-----------|-----------|-----------|
| $E(\text{MP2/cc-pVTZ}) = -1153.5730031 \text{ a.u.}$ |           |           |           |
| atom                                                 | X         | Y         | Z         |
| C                                                    | -0.240162 | 1.446004  | 0.000000  |
| C                                                    | 0.240162  | 0.729206  | 1.259685  |
| C                                                    | -0.240162 | -0.729206 | 1.259685  |
| C                                                    | 0.240162  | -1.446004 | 0.000000  |
| C                                                    | -0.240162 | -0.729206 | -1.259685 |
| C                                                    | 0.240162  | 0.729206  | -1.259685 |
| H                                                    | 0.128511  | -1.247187 | 2.150977  |
| H                                                    | 1.336157  | 0.765035  | 1.288372  |
| H                                                    | -0.128511 | 1.247187  | 2.150977  |
| H                                                    | 0.128511  | -1.247187 | -2.150977 |
| H                                                    | -1.336157 | -0.765035 | -1.288372 |
| H                                                    | 1.336157  | 0.765035  | -1.288372 |
| H                                                    | -0.128511 | 1.247187  | -2.150977 |
| H                                                    | -1.336157 | -0.765035 | 1.288372  |
| Cl                                                   | -0.320399 | -3.146510 | 0.000000  |
| H                                                    | 1.335871  | -1.483481 | 0.000000  |
| Cl                                                   | 0.320399  | 3.146510  | 0.000000  |
| H                                                    | -1.335871 | 1.483481  | 0.000000  |

**Table S23** Optimized cartesian coordinates and total energies of *r-1, t-2, c-3-1ax, 2ax, 3ax* -

trichlorocyclohexane.

| <i>r-1, t-2, c-3-1ax, 2ax, 3ax</i>                   |           |           |           |
|------------------------------------------------------|-----------|-----------|-----------|
| $E(\text{MP2/cc-pVTZ}) = -1612.6851258 \text{ a.u.}$ |           |           |           |
| atom                                                 | X         | Y         | Z         |
| C                                                    | 0.145783  | 0.136832  | 1.303639  |
| C                                                    | 0.919674  | 0.401369  | 0.000000  |
| C                                                    | 0.145783  | 0.136832  | -1.303639 |
| C                                                    | -1.285416 | 0.672214  | -1.254888 |
| C                                                    | -2.027714 | 0.206099  | 0.000000  |
| C                                                    | -1.285416 | 0.672214  | 1.254888  |
| H                                                    | 0.698077  | 0.611598  | -2.118642 |
| H                                                    | 1.856536  | -0.162151 | 0.000000  |
| H                                                    | 0.698077  | 0.611598  | 2.118642  |
| H                                                    | -1.235703 | 1.767833  | -1.259578 |
| H                                                    | -1.809964 | 0.358694  | -2.162564 |
| H                                                    | -3.040037 | 0.623553  | 0.000000  |
| H                                                    | -2.121051 | -0.884503 | 0.000000  |
| H                                                    | -1.235703 | 1.767833  | 1.259578  |
| H                                                    | -1.809964 | 0.358694  | 2.162564  |
| Cl                                                   | 0.145783  | -1.612671 | 1.693342  |
| Cl                                                   | 1.374528  | 2.142606  | 0.000000  |
| Cl                                                   | 0.145783  | -1.612671 | -1.693342 |

**Table S24** Optimized cartesian coordinates and total energies of *r-1, t-2, t-3-1ax, 2ax, 3eq* - trichlorocyclohexane.

| <i>r-1, t-2, t-3-1ax, 2ax, 3eq</i>                   |           |           |           |
|------------------------------------------------------|-----------|-----------|-----------|
| $E(\text{MP2/cc-pVTZ}) = -1612.6894115 \text{ a.u.}$ |           |           |           |
| atom                                                 | X         | Y         | Z         |
| C                                                    | 1.338124  | 0.663237  | -0.204065 |
| C                                                    | -0.144821 | 0.558069  | -0.595545 |
| C                                                    | -0.736308 | -0.775141 | -0.129829 |
| C                                                    | -0.556298 | -0.994008 | 1.368628  |
| C                                                    | 0.935308  | -0.930921 | 1.729773  |
| C                                                    | 1.566231  | 0.391905  | 1.282973  |
| H                                                    | -0.250369 | 0.654864  | -1.679878 |
| H                                                    | 1.702122  | 1.658294  | -0.474276 |
| H                                                    | -1.118007 | -0.231479 | 1.917895  |
| H                                                    | -0.969022 | -1.971379 | 1.637931  |
| H                                                    | 1.052956  | -1.042709 | 2.812885  |
| H                                                    | 1.461998  | -1.768416 | 1.258864  |
| H                                                    | 1.120733  | 1.220515  | 1.844573  |
| H                                                    | 2.642192  | 0.394156  | 1.483169  |
| Cl                                                   | 2.279155  | -0.491992 | -1.208298 |
| Cl                                                   | -1.000147 | 1.953618  | 0.124382  |
| Cl                                                   | -2.446946 | -0.922415 | -0.612453 |
| H                                                    | -0.201073 | -1.559267 | -0.674509 |

**Table S25** Optimized cartesian coordinates and total energies of *r-1, c-2, c-3-1ax, 2eq, 3ax* -

trichlorocyclohexane.

| <i>r-1, c-2, c-3-1ax, 2eq, 3ax</i>                   |           |           |           |
|------------------------------------------------------|-----------|-----------|-----------|
| $E(\text{MP2/cc-pVTZ}) = -1612.6809700 \text{ a.u.}$ |           |           |           |
| atom                                                 | X         | Y         | Z         |
| C                                                    | -0.448377 | -0.220946 | 1.301599  |
| C                                                    | -1.037743 | 0.336477  | 0.000000  |
| C                                                    | -0.448377 | -0.220946 | -1.301599 |
| C                                                    | -0.448377 | -1.753294 | -1.254521 |
| C                                                    | 0.246900  | -2.288175 | 0.000000  |
| C                                                    | -0.448377 | -1.753294 | 1.254521  |
| H                                                    | -1.083872 | 0.124392  | 2.122752  |
| H                                                    | -1.494517 | -2.089769 | -1.257720 |
| H                                                    | 0.023740  | -2.135709 | -2.164728 |
| H                                                    | 0.208873  | -3.382534 | 0.000000  |
| H                                                    | 1.300887  | -1.993743 | 0.000000  |
| H                                                    | -1.494517 | -2.089769 | 1.257720  |
| H                                                    | 0.023740  | -2.135709 | 2.164728  |
| Cl                                                   | 1.186298  | 0.385566  | 1.682277  |
| H                                                    | -1.083872 | 0.124392  | -2.122752 |
| Cl                                                   | -1.126435 | 2.110807  | 0.000000  |
| Cl                                                   | 1.186298  | 0.385566  | -1.682277 |
| H                                                    | -2.079093 | -0.013461 | 0.000000  |

**Table S26** Optimized cartesian coordinates and total energies of *r-1, c-2, c-3-1eq, 2ax, 3eq* - trichlorocyclohexane.

| <i>r-1, c-2, c-3-1eq, 2ax, 3eq</i>                   |           |           |           |
|------------------------------------------------------|-----------|-----------|-----------|
| $E(\text{MP2/cc-pVTZ}) = -1612.6866656 \text{ a.u.}$ |           |           |           |
| atom                                                 | X         | Y         | Z         |
| C                                                    | -0.553842 | 0.355198  | 1.239910  |
| C                                                    | -0.412996 | -0.537858 | 0.000000  |
| C                                                    | -0.553842 | 0.355198  | -1.239910 |
| C                                                    | 0.504717  | 1.453259  | -1.275781 |
| C                                                    | 0.414922  | 2.303313  | 0.000000  |
| C                                                    | 0.504717  | 1.453259  | 1.275781  |
| H                                                    | 1.495171  | 0.997706  | -1.368591 |
| H                                                    | 0.340635  | 2.080534  | -2.157425 |
| H                                                    | 1.214937  | 3.051447  | 0.000000  |
| H                                                    | -0.535889 | 2.852510  | 0.000000  |
| H                                                    | 1.495171  | 0.997706  | 1.368591  |
| H                                                    | 0.340635  | 2.080534  | 2.157425  |
| H                                                    | -1.547441 | 0.816708  | -1.179299 |
| Cl                                                   | -0.553842 | -0.608072 | -2.739777 |
| Cl                                                   | -0.553842 | -0.608072 | 2.739777  |
| H                                                    | -1.547441 | 0.816708  | 1.179299  |
| H                                                    | -1.199720 | -1.298417 | 0.000000  |
| Cl                                                   | 1.138383  | -1.412659 | 0.000000  |

**Table S27** Optimized cartesian coordinates and total energies of *r-1, t-2, t-3-1eq, 2eq, 3ax* -

trichlorocyclohexane.

| <i>r-1, t-2, t-3-1eq, 2eq, 3ax</i>         |           |           |           |
|--------------------------------------------|-----------|-----------|-----------|
| <i>E(MP2/cc-pVTZ) = -1612.6870259 a.u.</i> |           |           |           |
| atom                                       | X         | Y         | Z         |
| C                                          | -0.844590 | 0.546415  | -0.368998 |
| C                                          | -0.217522 | -0.429664 | 0.628003  |
| C                                          | 1.312218  | -0.309633 | 0.646224  |
| C                                          | 1.733859  | 1.125232  | 0.968317  |
| C                                          | 1.127074  | 2.118058  | -0.025663 |
| C                                          | -0.398622 | 1.979067  | -0.057809 |
| H                                          | 1.381576  | 1.359180  | 1.981989  |
| H                                          | 2.826755  | 1.185717  | 0.973174  |
| H                                          | 1.389039  | 3.140693  | 0.265532  |
| H                                          | 1.543723  | 1.945866  | -1.022997 |
| H                                          | -0.814972 | 2.262009  | 0.917153  |
| H                                          | -0.834075 | 2.652066  | -0.803619 |
| Cl                                         | -2.627956 | 0.470269  | -0.294806 |
| H                                          | -0.557446 | 0.259214  | -1.384656 |
| Cl                                         | 2.028343  | -0.815286 | -0.915462 |
| H                                          | 1.704861  | -1.003641 | 1.395463  |
| H                                          | -0.569944 | -0.165451 | 1.632892  |
| Cl                                         | -0.714742 | -2.114542 | 0.345835  |

**Table S28** Optimized cartesian coordinates and total energies of *r-1, t-2, c-3-1eq, 2eq, 3eq* - trichlorocyclohexane.

| <i>r-1, t-2, c-3-1eq, 2eq, 3eq</i>         |           |           |           |
|--------------------------------------------|-----------|-----------|-----------|
| <i>E(MP2/cc-pVTZ) = -1612.6865852 a.u.</i> |           |           |           |
| atom                                       | X         | Y         | Z         |
| C                                          | 0.366878  | 0.221196  | -1.263773 |
| C                                          | -0.278577 | -0.363599 | 0.000000  |
| C                                          | 0.366878  | 0.221196  | 1.263773  |
| C                                          | 0.366878  | 1.749178  | 1.251990  |
| C                                          | 1.067847  | 2.277970  | 0.000000  |
| C                                          | 0.366878  | 1.749178  | -1.251990 |
| H                                          | -0.670040 | 2.105612  | 1.275976  |
| H                                          | 0.858650  | 2.107654  | 2.161901  |
| H                                          | 1.056243  | 3.373056  | 0.000000  |
| H                                          | 2.119755  | 1.964535  | 0.000000  |
| H                                          | -0.670040 | 2.105612  | -1.275976 |
| H                                          | 0.858650  | 2.107654  | -2.161901 |
| Cl                                         | -0.118658 | -2.140167 | 0.000000  |
| H                                          | -1.349966 | -0.132430 | 0.000000  |
| H                                          | 1.395458  | -0.151609 | 1.332505  |
| Cl                                         | -0.485814 | -0.355187 | 2.724108  |
| Cl                                         | -0.485814 | -0.355187 | -2.724108 |
| H                                          | 1.395458  | -0.151609 | -1.332505 |

**Table S29** Optimized cartesian coordinates and total energies of *r-1, t-2, t-4-1ax, 2ax, 4ax* -

trichlorocyclohexane.

| <i>r-1, t-2, t-4-1ax, 2ax, 4ax</i>                   |           |           |           |
|------------------------------------------------------|-----------|-----------|-----------|
| $E(\text{MP2/cc-pVTZ}) = -1612.6874155 \text{ a.u.}$ |           |           |           |
| atom                                                 | X         | Y         | Z         |
| C                                                    | -1.305190 | 0.343406  | -0.557140 |
| C                                                    | -0.448222 | 1.010504  | 0.526037  |
| C                                                    | 0.294943  | -0.006638 | 1.397428  |
| C                                                    | 0.977780  | -1.156703 | 0.648289  |
| C                                                    | 0.066452  | -1.773678 | -0.413555 |
| C                                                    | -0.529571 | -0.713101 | -1.340664 |
| H                                                    | 1.017461  | 0.512782  | 2.033379  |
| H                                                    | -1.094084 | 1.616318  | 1.167286  |
| H                                                    | -1.700553 | 1.111126  | -1.227448 |
| H                                                    | 1.251917  | -1.921230 | 1.381309  |
| H                                                    | 0.630808  | -2.509891 | -0.993216 |
| H                                                    | -0.742146 | -2.303934 | 0.102459  |
| H                                                    | 0.269541  | -0.205603 | -1.891727 |
| H                                                    | -1.198467 | -1.181100 | -2.069247 |
| H                                                    | -0.456685 | -0.464783 | 2.052712  |
| Cl                                                   | -2.737170 | -0.396980 | 0.241006  |
| Cl                                                   | 0.654420  | 2.176174  | -0.272478 |
| Cl                                                   | 2.534812  | -0.654279 | -0.093108 |

**Table S30** Optimized cartesian coordinates and total energies of *r-1, t-2, c-4-1ax, 2ax, 4eq* - trichlorocyclohexane.

| <i>r-1, t-2, c-4-1ax, 2ax, 4eq</i>                   |           |           |           |
|------------------------------------------------------|-----------|-----------|-----------|
| $E(\text{MP2/cc-pVTZ}) = -1612.6925128 \text{ a.u.}$ |           |           |           |
| atom                                                 | X         | Y         | Z         |
| C                                                    | 1.542416  | -0.293705 | 0.319180  |
| C                                                    | 0.930318  | 0.720966  | -0.654522 |
| C                                                    | -0.514363 | 0.380485  | -1.023545 |
| C                                                    | -1.372661 | 0.165501  | 0.221809  |
| C                                                    | -0.783638 | -0.913311 | 1.127136  |
| C                                                    | 0.648323  | -0.542650 | 1.533195  |
| H                                                    | -0.930830 | 1.183036  | -1.639261 |
| H                                                    | 1.544845  | 0.776741  | -1.557316 |
| H                                                    | 2.529943  | 0.055738  | 0.633376  |
| H                                                    | -1.404649 | -1.022579 | 2.021976  |
| H                                                    | -0.792481 | -1.870940 | 0.596583  |
| H                                                    | 0.638862  | 0.372423  | 2.136255  |
| H                                                    | 1.085564  | -1.338235 | 2.144243  |
| H                                                    | -0.512541 | -0.539382 | -1.618112 |
| Cl                                                   | 1.819252  | -1.824689 | -0.576855 |
| Cl                                                   | 1.016249  | 2.347654  | 0.104002  |
| Cl                                                   | -3.035554 | -0.277383 | -0.270321 |
| H                                                    | -1.460191 | 1.104587  | 0.776700  |

**Table S31** Optimized cartesian coordinates and total energies of *r-1, c-2, t-4-1ax, 2eq, 4ax* -

trichlorocyclohexane.

| <i>r-1, c-2, t-4-1ax, 2eq, 4ax</i>         |           |           |           |
|--------------------------------------------|-----------|-----------|-----------|
| <i>E(MP2/cc-pVTZ) = -1612.6913901 a.u.</i> |           |           |           |
| atom                                       | X         | Y         | Z         |
| C                                          | -0.858172 | -0.612855 | -0.789794 |
| C                                          | -0.467627 | 0.783638  | -0.302537 |
| C                                          | 0.336159  | 0.735145  | 0.993663  |
| C                                          | 1.580177  | -0.143694 | 0.835003  |
| C                                          | 1.238934  | -1.533578 | 0.297345  |
| C                                          | 0.403765  | -1.460003 | -0.984120 |
| H                                          | 0.630664  | 1.747213  | 1.284857  |
| H                                          | -1.409913 | -0.528107 | -1.730910 |
| H                                          | 2.161782  | -2.092293 | 0.114976  |
| H                                          | 0.674518  | -2.062266 | 1.073814  |
| H                                          | 0.995884  | -1.008220 | -1.788517 |
| H                                          | 0.114103  | -2.464689 | -1.306477 |
| H                                          | -0.288145 | 0.316575  | 1.790638  |
| Cl                                         | -1.966958 | -1.426522 | 0.358215  |
| H                                          | 2.089106  | -0.229626 | 1.799711  |
| H                                          | 0.148358  | 1.224366  | -1.093430 |
| Cl                                         | -1.884867 | 1.849985  | -0.126383 |
| Cl                                         | 2.762662  | 0.663897  | -0.257833 |

**Table S32** Optimized cartesian coordinates and total energies of *r-1, c-2, c-4-1ax, 2eq, 4eq* - trichlorocyclohexane.

| <i>r-1, c-2, c-4-1ax, 2eq, 4eq</i>         |           |           |           |
|--------------------------------------------|-----------|-----------|-----------|
| <i>E(MP2/cc-pVTZ) = -1612.6895405 a.u.</i> |           |           |           |
| atom                                       | X         | Y         | Z         |
| C                                          | -1.163835 | 0.821319  | 0.599089  |
| C                                          | -0.852761 | -0.676842 | 0.621778  |
| C                                          | 0.417793  | -1.014496 | -0.156307 |
| C                                          | 1.591091  | -0.223987 | 0.426121  |
| C                                          | 1.329230  | 1.280004  | 0.414617  |
| C                                          | 0.030637  | 1.593807  | 1.168119  |
| H                                          | 0.618269  | -2.087288 | -0.080397 |
| H                                          | -2.061739 | 1.014990  | 1.193761  |
| H                                          | 2.167469  | 1.802427  | 0.886251  |
| H                                          | 1.259471  | 1.626023  | -0.621089 |
| H                                          | 0.138272  | 1.315257  | 2.225135  |
| H                                          | -0.181627 | 2.666756  | 1.130818  |
| H                                          | 0.285945  | -0.764978 | -1.213265 |
| Cl                                         | -1.529565 | 1.393983  | -1.054618 |
| H                                          | -0.708870 | -0.940913 | 1.677215  |
| Cl                                         | -2.228896 | -1.656349 | 0.054112  |
| Cl                                         | 3.087997  | -0.605833 | -0.475787 |
| H                                          | 1.767762  | -0.551730 | 1.458057  |

**Table S33** Optimized cartesian coordinates and total energies of *r-1, c-2, c-4-1eq, 2ax, 4ax* -

trichlorocyclohexane.

| <i>r-1, c-2, c-4-1eq, 2ax, 4ax</i>         |           |           |           |
|--------------------------------------------|-----------|-----------|-----------|
| <i>E(MP2/cc-pVTZ) = -1612.6835003 a.u.</i> |           |           |           |
| atom                                       | X         | Y         | Z         |
| C                                          | -1.208797 | -0.681802 | 0.331726  |
| C                                          | -0.532862 | 0.559372  | 0.921064  |
| C                                          | 0.837673  | 0.175971  | 1.499022  |
| C                                          | 1.732400  | -0.675292 | 0.589224  |
| C                                          | 0.960547  | -1.831967 | -0.048364 |
| C                                          | -0.337898 | -1.365989 | -0.715860 |
| H                                          | 1.367456  | 1.077406  | 1.820709  |
| H                                          | 1.601589  | -2.350302 | -0.767822 |
| H                                          | 0.714263  | -2.547007 | 0.749057  |
| H                                          | -0.130928 | -0.674940 | -1.538301 |
| H                                          | -0.873209 | -2.228974 | -1.122967 |
| H                                          | 0.641947  | -0.429458 | 2.395432  |
| H                                          | -1.355343 | -1.375379 | 1.169946  |
| Cl                                         | -2.838579 | -0.322949 | -0.291396 |
| Cl                                         | 2.543962  | 0.296068  | -0.680443 |
| H                                          | 2.547794  | -1.075580 | 1.199143  |
| H                                          | -1.154126 | 0.951200  | 1.732215  |
| Cl                                         | -0.415137 | 1.884015  | -0.269236 |

**Table S34** Optimized cartesian coordinates and total energies of *r-1, c-2, t-4-1eq, 2ax, 4eq* - trichlorocyclohexane.

| <i>r-1, c-2, t-4-1eq, 2ax, 4eq</i>         |           |           |           |
|--------------------------------------------|-----------|-----------|-----------|
| <i>E(MP2/cc-pVTZ) = -1612.6899900 a.u.</i> |           |           |           |
| atom                                       | X         | Y         | Z         |
| C                                          | -1.171205 | -0.704955 | 0.424572  |
| C                                          | -0.640271 | 0.700192  | 0.718739  |
| C                                          | 0.873138  | 0.639975  | 0.952990  |
| C                                          | 1.593678  | -0.000152 | -0.233190 |
| C                                          | 1.040459  | -1.391635 | -0.532403 |
| C                                          | -0.475709 | -1.340482 | -0.775218 |
| H                                          | 1.256788  | 1.647740  | 1.137576  |
| H                                          | 1.546535  | -1.813411 | -1.406927 |
| H                                          | 1.258206  | -2.046314 | 0.320755  |
| H                                          | -0.706572 | -0.764271 | -1.676671 |
| H                                          | -0.859825 | -2.354809 | -0.920435 |
| H                                          | 1.062083  | 0.036090  | 1.849771  |
| H                                          | -0.955879 | -1.303234 | 1.318810  |
| Cl                                         | -2.943370 | -0.718407 | 0.235172  |
| H                                          | -1.139428 | 1.100730  | 1.606188  |
| Cl                                         | -1.007758 | 1.839678  | -0.611628 |
| Cl                                         | 3.346847  | -0.095271 | 0.114891  |
| H                                          | 1.490336  | 0.637824  | -1.115407 |

**Table S35** Optimized cartesian coordinates and total energies of *r-1, t-2, c-4-1eq, 2eq, 4ax* -

trichlorocyclohexane.

| <i>r-1, t-2, c-4-1eq, 2eq, 4ax</i>         |           |           |           |
|--------------------------------------------|-----------|-----------|-----------|
| <i>E(MP2/cc-pVTZ) = -1612.6903962 a.u.</i> |           |           |           |
| atom                                       | X         | Y         | Z         |
| C                                          | -0.869772 | -0.704009 | 0.420602  |
| C                                          | -0.495555 | 0.677187  | -0.116707 |
| C                                          | 0.703108  | 1.246081  | 0.648102  |
| C                                          | 1.905634  | 0.304396  | 0.632917  |
| C                                          | 1.520564  | -1.081262 | 1.146435  |
| C                                          | 0.329890  | -1.654019 | 0.373520  |
| H                                          | 0.974641  | 2.219185  | 0.228563  |
| H                                          | 2.377426  | -1.759029 | 1.080820  |
| H                                          | 1.258256  | -0.976967 | 2.207845  |
| H                                          | 0.606091  | -1.829524 | -0.670861 |
| H                                          | 0.032118  | -2.616499 | 0.800785  |
| H                                          | 0.409426  | 1.402645  | 1.694037  |
| H                                          | -0.268040 | 0.595718  | -1.183671 |
| Cl                                         | -1.857261 | 1.823006  | 0.036988  |
| H                                          | -1.222361 | -0.592162 | 1.453018  |
| Cl                                         | -2.218508 | -1.416338 | -0.507716 |
| Cl                                         | 2.579486  | 0.187384  | -1.028517 |
| H                                          | 2.706044  | 0.727515  | 1.247411  |

**Table S36** Optimized cartesian coordinates and total energies of *r-1, t-2, t-4-1eq, 2eq, 4eq* - trichlorocyclohexane.

| <i>r-1, t-2, t-4-1eq, 2eq, 4eq</i>         |           |           |           |
|--------------------------------------------|-----------|-----------|-----------|
| <i>E(MP2/cc-pVTZ) = -1612.6896384 a.u.</i> |           |           |           |
| atom                                       | X         | Y         | Z         |
| C                                          | 1.079412  | -0.642739 | -0.341298 |
| C                                          | 0.640970  | 0.649706  | 0.347475  |
| C                                          | -0.816474 | 0.979972  | 0.008831  |
| C                                          | -1.739209 | -0.178416 | 0.381315  |
| C                                          | -1.318771 | -1.456147 | -0.335877 |
| C                                          | 0.133767  | -1.790656 | 0.020506  |
| H                                          | -1.112265 | 1.890243  | 0.539122  |
| H                                          | -1.975046 | -2.284658 | -0.050819 |
| H                                          | -1.422241 | -1.306434 | -1.417359 |
| H                                          | 0.220373  | -1.992229 | 1.095308  |
| H                                          | 0.455024  | -2.695309 | -0.505166 |
| H                                          | -0.902944 | 1.177273  | -1.066051 |
| H                                          | 0.762632  | 0.527558  | 1.430177  |
| Cl                                         | 1.668320  | 2.027760  | -0.134093 |
| Cl                                         | -3.430733 | 0.244042  | -0.016569 |
| H                                          | -1.709002 | -0.341819 | 1.465068  |
| H                                          | 1.080310  | -0.479695 | -1.425211 |
| Cl                                         | 2.746237  | -1.087404 | 0.118262  |

**Table S37** Optimized cartesian coordinates and total energies of *r-1, c-3, c-5-1ax, 3ax, 5ax* -

trichlorocyclohexane.

| <i>r-1, c-3, c-5-1ax, 3ax, 5ax</i>                   |           |           |           |
|------------------------------------------------------|-----------|-----------|-----------|
| $E(\text{MP2/cc-pVTZ}) = -1612.6755200 \text{ a.u.}$ |           |           |           |
| atom                                                 | X         | Y         | Z         |
| C                                                    | 0.646300  | 1.351845  | 0.776641  |
| C                                                    | -0.827880 | 1.206887  | 1.164868  |
| C                                                    | -1.493923 | -0.116196 | 0.776565  |
| C                                                    | -0.631315 | -1.320387 | 1.164859  |
| C                                                    | 0.847550  | -1.235662 | 0.776632  |
| C                                                    | 1.459085  | 0.113480  | 1.164937  |
| H                                                    | -2.433618 | -0.189285 | 1.332276  |
| H                                                    | -0.861387 | 1.255679  | 2.263138  |
| H                                                    | -1.406606 | 2.050619  | 0.778209  |
| H                                                    | 1.052828  | 2.202170  | 1.332396  |
| H                                                    | -0.656874 | -1.373781 | 2.263128  |
| H                                                    | -1.072624 | -2.243452 | 0.778193  |
| H                                                    | 1.380666  | -2.012908 | 1.332382  |
| H                                                    | 1.518043  | 0.118062  | 2.263210  |
| H                                                    | 2.479159  | 0.192820  | 0.778328  |
| Cl                                                   | 0.861051  | 1.800906  | -0.942479 |
| Cl                                                   | -1.990115 | -0.154782 | -0.942577 |
| Cl                                                   | 1.129153  | -1.646108 | -0.942490 |

**Table S38** Optimized cartesian coordinates and total energies of *r-1, c-3, t-5-1ax, 3ax, 5eq* - trichlorocyclohexane.

| <i>r-1, c-3, t-5-1ax, 3ax, 5eq</i>                   |           |           |           |
|------------------------------------------------------|-----------|-----------|-----------|
| $E(\text{MP2/cc-pVTZ}) = -1612.6866329 \text{ a.u.}$ |           |           |           |
| atom                                                 | X         | Y         | Z         |
| C                                                    | 1.036575  | -0.232649 | 1.297221  |
| C                                                    | 1.837367  | -0.388908 | 0.000000  |
| C                                                    | 1.036575  | -0.232649 | -1.297221 |
| C                                                    | 0.105337  | 0.981374  | -1.253290 |
| C                                                    | -0.764245 | 0.971099  | 0.000000  |
| C                                                    | 0.105337  | 0.981374  | 1.253290  |
| H                                                    | 1.744556  | -0.106925 | -2.121714 |
| H                                                    | 2.581922  | 0.419932  | 0.000000  |
| H                                                    | 2.380652  | -1.338372 | 0.000000  |
| H                                                    | 1.744556  | -0.106925 | 2.121714  |
| H                                                    | 0.723109  | 1.889173  | -1.238574 |
| H                                                    | -0.514096 | 1.007844  | -2.154321 |
| H                                                    | 0.723109  | 1.889173  | 1.238574  |
| H                                                    | -0.514096 | 1.007844  | 2.154321  |
| Cl                                                   | 0.105337  | -1.709448 | 1.709864  |
| Cl                                                   | 0.105337  | -1.709448 | -1.709864 |
| Cl                                                   | -1.833861 | 2.405129  | 0.000000  |
| H                                                    | -1.417212 | 0.094441  | 0.000000  |

**Table S39** Optimized cartesian coordinates and total energies of *r-1, c-3, t-5-1eq, 3eq, 5ax* -

trichlorocyclohexane.

| <i>r-1, c-3, t-5-1eq, 3eq, 5ax</i>                   |           |           |           |
|------------------------------------------------------|-----------|-----------|-----------|
| $E(\text{MP2/cc-pVTZ}) = -1612.6921889 \text{ a.u.}$ |           |           |           |
| atom                                                 | X         | Y         | Z         |
| C                                                    | 0.122560  | -0.465624 | 1.252551  |
| C                                                    | 0.811122  | -1.008100 | 0.000000  |
| C                                                    | 0.122560  | -0.465624 | -1.252551 |
| C                                                    | 0.122560  | 1.061259  | -1.267179 |
| C                                                    | -0.520078 | 1.628237  | 0.000000  |
| C                                                    | 0.122560  | 1.061259  | 1.267179  |
| H                                                    | 1.861798  | -0.694208 | 0.000000  |
| H                                                    | 0.786125  | -2.102304 | 0.000000  |
| H                                                    | 1.161773  | 1.411972  | -1.306727 |
| H                                                    | -0.396920 | 1.436526  | -2.153788 |
| H                                                    | 1.161773  | 1.411972  | 1.306727  |
| H                                                    | -0.396920 | 1.436526  | 2.153788  |
| H                                                    | -0.905592 | -0.836413 | -1.301985 |
| Cl                                                   | 0.948923  | -1.083144 | -2.713898 |
| Cl                                                   | -2.287692 | 1.294860  | 0.000000  |
| H                                                    | -0.426768 | 2.718198  | 0.000000  |
| H                                                    | -0.905592 | -0.836413 | 1.301985  |
| Cl                                                   | 0.948923  | -1.083144 | 2.713898  |

**Table S40** Optimized cartesian coordinates and total energies of *r-1, c-3, c-5-1eq, 3eq, 5eq* - trichlorocyclohexane.

| <i>r-1, c-3, c-5-1eq, 3eq, 5eq</i>                   |           |           |           |
|------------------------------------------------------|-----------|-----------|-----------|
| $E(\text{MP2/cc-pVTZ}) = -1612.6906529 \text{ a.u.}$ |           |           |           |
| atom                                                 | X         | Y         | Z         |
| C                                                    | -1.260857 | -0.699672 | 0.409059  |
| C                                                    | -1.251102 | 0.750945  | -0.072073 |
| C                                                    | 0.024493  | 1.441769  | 0.409061  |
| C                                                    | 1.275888  | 0.708014  | -0.072069 |
| C                                                    | 1.236363  | -0.742099 | 0.409061  |
| C                                                    | -0.024787 | -1.458959 | -0.072070 |
| H                                                    | -1.284083 | 0.770741  | -1.167417 |
| H                                                    | -2.132444 | 1.279947  | 0.303074  |
| H                                                    | 1.309526  | 0.726677  | -1.167413 |
| H                                                    | 2.174690  | 1.206773  | 0.303080  |
| H                                                    | -0.025440 | -1.497424 | -1.167414 |
| H                                                    | -0.042249 | -2.486722 | 0.303081  |
| H                                                    | 0.025235  | 1.485492  | 1.504893  |
| Cl                                                   | 0.053299  | 3.137226  | -0.156618 |
| H                                                    | -1.299093 | -0.720886 | 1.504892  |
| Cl                                                   | -2.743569 | -1.522455 | -0.156618 |
| Cl                                                   | 2.690271  | -1.614770 | -0.156615 |
| H                                                    | 1.273853  | -0.764600 | 1.504893  |

**Table S41** Optimized cartesian coordinates and total energies of *r-1, t-2, c-3, t-4-1ax, 2ax*,

3ax, 4ax-tetrachlorocyclohexane.

| <i>r-1, t-2, c-3, t-4-1ax, 2ax, 3ax, 4ax</i> |           |           |           |
|----------------------------------------------|-----------|-----------|-----------|
| <i>E</i> (MP2/cc-pVTZ) = -2071.7994369 a.u.  |           |           |           |
| atom                                         | X         | Y         | Z         |
| C                                            | 1.001844  | 1.118797  | 0.471101  |
| C                                            | 0.324332  | 0.700179  | -0.845617 |
| C                                            | -0.324245 | -0.699864 | -0.845906 |
| C                                            | -1.001889 | -1.118967 | 0.470592  |
| C                                            | -0.176283 | -0.743742 | 1.698118  |
| C                                            | 0.176108  | 0.743132  | 1.698405  |
| H                                            | -1.050683 | -0.743587 | -1.660307 |
| H                                            | 1.050855  | 0.744196  | -1.659927 |
| H                                            | 1.158486  | 2.199171  | 0.435366  |
| H                                            | -1.158517 | -2.199329 | 0.434447  |
| H                                            | -0.743968 | -0.998785 | 2.597112  |
| H                                            | 0.739530  | -1.343988 | 1.694644  |
| H                                            | -0.739704 | 1.343381  | 1.695053  |
| H                                            | 0.743700  | 0.997849  | 2.597550  |
| Cl                                           | 2.643879  | 0.405713  | 0.585524  |
| Cl                                           | 0.917487  | -1.935676 | -1.233092 |
| Cl                                           | -2.643946 | -0.405946 | 0.585106  |
| Cl                                           | -0.917355 | 1.936138  | -1.232485 |

**Table S42** Optimized cartesian coordinates and total energies of *r-1, t-2, c-3, c-4-1ax, 2ax, 3ax, 4eq*-tetrachlorocyclohexane.

| <i>r-1, t-2, c-3, c-4-1ax, 2ax, 3ax, 4eq</i> |           |           |           |
|----------------------------------------------|-----------|-----------|-----------|
| <i>E</i> (MP2/cc-pVTZ) = -2071.8011986 a.u.  |           |           |           |
| atom                                         | X         | Y         | Z         |
| C                                            | 1.678530  | 0.018113  | 0.511309  |
| C                                            | 0.946331  | 0.637003  | -0.693185 |
| C                                            | -0.551495 | 0.292554  | -0.814593 |
| C                                            | -1.250515 | 0.435299  | 0.540837  |
| C                                            | -0.568579 | -0.389872 | 1.625492  |
| C                                            | 0.867163  | 0.115800  | 1.803003  |
| H                                            | -1.001831 | 0.983744  | -1.532045 |
| H                                            | 1.456015  | 0.363966  | -1.620794 |
| H                                            | 2.628286  | 0.546567  | 0.625542  |
| H                                            | -1.116940 | -0.270802 | 2.564678  |
| H                                            | -0.583163 | -1.450150 | 1.356237  |
| H                                            | 0.844786  | 1.167941  | 2.111700  |
| H                                            | 1.379162  | -0.448522 | 2.587840  |
| Cl                                           | 2.123757  | -1.684706 | 0.182353  |
| Cl                                           | -0.758100 | -1.335817 | -1.510414 |
| Cl                                           | 1.084019  | 2.424127  | -0.545476 |
| Cl                                           | -2.987631 | 0.064592  | 0.418073  |
| H                                            | -1.189685 | 1.494545  | 0.812570  |

**Table S43** Optimized cartesian coordinates and total energies of *r-1, t-2, t-3, t-4-1ax, 2ax, 3eq,*

4ax-tetrachlorocyclohexane.

| <i>r-1, t-2, t-3, t-4-1ax, 2ax, 3eq, 4ax</i> |           |           |           |
|----------------------------------------------|-----------|-----------|-----------|
| E(MP2/cc-pVTZ) = -2071.8009607 a.u.          |           |           |           |
| atom                                         | X         | Y         | Z         |
| C                                            | -1.648588 | -0.082230 | 0.633275  |
| C                                            | -0.425506 | -0.966333 | 0.340031  |
| C                                            | 0.357479  | -0.428596 | -0.863948 |
| C                                            | 0.692450  | 1.066858  | -0.835817 |
| C                                            | -0.576722 | 1.877068  | -0.550909 |
| C                                            | -1.286510 | 1.398806  | 0.716743  |
| H                                            | -0.762278 | -1.978455 | 0.099210  |
| H                                            | -2.108263 | -0.421617 | 1.565020  |
| H                                            | -0.307935 | 2.933339  | -0.459790 |
| H                                            | -1.248627 | 1.777282  | -1.411047 |
| H                                            | -0.634993 | 1.539980  | 1.585712  |
| H                                            | -2.198744 | 1.980309  | 0.879822  |
| Cl                                           | -2.879576 | -0.357488 | -0.648296 |
| Cl                                           | 0.531060  | -1.112402 | 1.837195  |
| H                                            | -0.324504 | -0.543553 | -1.714930 |
| Cl                                           | 1.769627  | -1.437712 | -1.236351 |
| Cl                                           | 1.980330  | 1.506850  | 0.320497  |
| H                                            | 1.085242  | 1.332072  | -1.822012 |

**Table S44** Optimized cartesian coordinates and total energies of *r-1, c-2, c-3, c-4-1ax, 2eq, 3ax, 4eq*-tetrachlorocyclohexane.

| <i>r-1, c-2, c-3, c-4-1ax, 2eq, 3ax, 4eq</i> |           |           |           |
|----------------------------------------------|-----------|-----------|-----------|
| E(MP2/cc-pVTZ) = -2071.7965581 a.u.          |           |           |           |
| atom                                         | X         | Y         | Z         |
| C                                            | 1.289711  | 1.063789  | -0.545563 |
| C                                            | 0.835908  | -0.341610 | -0.962629 |
| C                                            | -0.494914 | -0.823889 | -0.361821 |
| C                                            | -1.556043 | 0.249676  | -0.643994 |
| C                                            | -1.155635 | 1.609564  | -0.083192 |
| C                                            | 0.144882  | 2.060433  | -0.756958 |
| H                                            | 2.135095  | 1.335060  | -1.184936 |
| H                                            | -1.947986 | 2.333589  | -0.294804 |
| H                                            | -1.034190 | 1.544942  | 1.002000  |
| H                                            | -0.024179 | 2.158676  | -1.838138 |
| H                                            | 0.453144  | 3.041287  | -0.383253 |
| Cl                                           | 1.903763  | 1.174131  | 1.124623  |
| H                                            | 0.646500  | -0.261560 | -2.041737 |
| Cl                                           | 2.121965  | -1.552597 | -0.791394 |
| Cl                                           | -3.167579 | -0.254842 | -0.081373 |
| H                                            | -1.634943 | 0.328886  | -1.735941 |
| Cl                                           | -0.399340 | -1.227816 | 1.364319  |
| H                                            | -0.776632 | -1.749560 | -0.873225 |

**Table S45** Optimized cartesian coordinates and total energies of *r-1, c-2, t-3, t-4-1ax, 2eq, 3eq,*

## 4ax-tetrachlorocyclohexane.

| <i>r-1, c-2, t-3, t-4-1ax, 2eq, 3eq, 4ax</i>         |           |           |           |
|------------------------------------------------------|-----------|-----------|-----------|
| $E(\text{MP2/cc-pVTZ}) = -2071.8041579 \text{ a.u.}$ |           |           |           |
| atom                                                 | X         | Y         | Z         |
| C                                                    | 1.289711  | 1.063789  | -0.545563 |
| C                                                    | 0.835908  | -0.341610 | -0.962629 |
| C                                                    | -0.494914 | -0.823889 | -0.361821 |
| C                                                    | -1.556043 | 0.249676  | -0.643994 |
| C                                                    | -1.155635 | 1.609564  | -0.083192 |
| C                                                    | 0.144882  | 2.060433  | -0.756958 |
| H                                                    | 2.135095  | 1.335060  | -1.184936 |
| H                                                    | -1.947986 | 2.333589  | -0.294804 |
| H                                                    | -1.034190 | 1.544942  | 1.002000  |
| H                                                    | -0.024179 | 2.158676  | -1.838138 |
| H                                                    | 0.453144  | 3.041287  | -0.383253 |
| Cl                                                   | 1.903763  | 1.174131  | 1.124623  |
| H                                                    | 0.646500  | -0.261560 | -2.041737 |
| Cl                                                   | 2.121965  | -1.552597 | -0.791394 |
| Cl                                                   | -3.167579 | -0.254842 | -0.081373 |
| H                                                    | -1.634943 | 0.328886  | -1.735941 |
| Cl                                                   | -0.399340 | -1.227816 | 1.364319  |
| H                                                    | -0.776632 | -1.749560 | -0.873225 |

**Table S46** Optimized cartesian coordinates and total energies of *r-1, c-2, t-3, c-4-1ax, 2eq, 3eq, 4eq*-tetrachlorocyclohexane.

| <i>r-1, c-2, t-3, c-4-1ax, 2eq, 3eq, 4eq</i>         |           |           |           |
|------------------------------------------------------|-----------|-----------|-----------|
| $E(\text{MP2/cc-pVTZ}) = -2071.8028550 \text{ a.u.}$ |           |           |           |
| atom                                                 | X         | Y         | Z         |
| C                                                    | 1.528799  | -0.840337 | 0.608231  |
| C                                                    | 0.871708  | 0.542948  | 0.610934  |
| C                                                    | -0.469431 | 0.555780  | -0.135797 |
| C                                                    | -1.399525 | -0.528015 | 0.429384  |
| C                                                    | -0.747082 | -1.909812 | 0.462372  |
| C                                                    | 0.578889  | -1.867000 | 1.222179  |
| H                                                    | 2.459013  | -0.782984 | 1.181265  |
| H                                                    | -1.437650 | -2.606826 | 0.946633  |
| H                                                    | -0.586994 | -2.261394 | -0.560683 |
| H                                                    | 0.404971  | -1.586036 | 2.269455  |
| H                                                    | 1.054400  | -2.852480 | 1.217129  |
| Cl                                                   | 1.990658  | -1.346686 | -1.043712 |
| H                                                    | -0.303810 | 0.389340  | -1.204398 |
| Cl                                                   | -1.238617 | 2.154154  | 0.043423  |
| H                                                    | 0.680886  | 0.801240  | 1.660226  |
| Cl                                                   | 1.992109  | 1.774105  | -0.014020 |
| Cl                                                   | -2.906640 | -0.616448 | -0.523200 |
| H                                                    | -1.688642 | -0.229368 | 1.444215  |

**Table S47** Optimized cartesian coordinates and total energies of *r-1, c-2, t-3, t-4-1eq, 2ax, 3ax,*

4eq-tetrachlorocyclohexane.

| <i>r-1, c-2, t-3, t-4-1eq, 2ax, 3ax, 4eq</i> |           |           |           |
|----------------------------------------------|-----------|-----------|-----------|
| E(MP2/cc-pVTZ) = -2071.8056612 a.u.          |           |           |           |
| atom                                         | X         | Y         | Z         |
| C                                            | -1.330253 | 0.609705  | 0.422414  |
| C                                            | -0.769302 | -0.025509 | -0.853961 |
| C                                            | 0.769307  | 0.025511  | -0.853957 |
| C                                            | 1.330251  | -0.609706 | 0.422420  |
| C                                            | 0.767616  | 0.037895  | 1.683488  |
| C                                            | -0.767625 | -0.037900 | 1.683483  |
| H                                            | 1.162105  | -0.484428 | 2.560394  |
| H                                            | 1.101089  | 1.079262  | 1.739175  |
| H                                            | -1.101099 | -1.079268 | 1.739165  |
| H                                            | -1.162120 | 0.484420  | 2.560389  |
| Cl                                           | -3.111645 | 0.592187  | 0.421022  |
| H                                            | -1.038144 | 1.663973  | 0.398414  |
| Cl                                           | -1.278629 | -1.729005 | -1.037406 |
| H                                            | -1.146490 | 0.507093  | -1.731356 |
| H                                            | 1.038142  | -1.663975 | 0.398415  |
| Cl                                           | 3.111643  | -0.592188 | 0.421038  |
| Cl                                           | 1.278635  | 1.729008  | -1.037394 |
| H                                            | 1.146499  | -0.507087 | -1.731352 |

**Table S48** Optimized cartesian coordinates and total energies of *r-1, c-2, c-3, t-4-1eq, 2ax, 3eq, 4eq*-tetrachlorocyclohexane.

| <i>r-1, c-2, c-3, t-4-1eq, 2ax, 3eq, 4eq</i> |           |           |           |
|----------------------------------------------|-----------|-----------|-----------|
| E(MP2/cc-pVTZ) = -2071.8029258 a.u.          |           |           |           |
| atom                                         | X         | Y         | Z         |
| C                                            | 1.517987  | -0.607194 | -0.572145 |
| C                                            | 0.720207  | 0.687635  | -0.384705 |
| C                                            | -0.771158 | 0.384702  | -0.602110 |
| C                                            | -1.268283 | -0.679254 | 0.379201  |
| C                                            | -0.416199 | -1.947701 | 0.260237  |
| C                                            | 1.084693  | -1.676122 | 0.423562  |
| H                                            | -0.751982 | -2.669364 | 1.011519  |
| H                                            | -0.604648 | -2.395165 | -0.723473 |
| H                                            | 1.318696  | -1.346185 | 1.439711  |
| H                                            | 1.642676  | -2.597935 | 0.233822  |
| Cl                                           | 3.271924  | -0.308502 | -0.501551 |
| H                                            | 1.310699  | -0.958603 | -1.590688 |
| Cl                                           | -1.725695 | 1.882402  | -0.536063 |
| H                                            | -0.880403 | -0.007807 | -1.620894 |
| Cl                                           | 1.009728  | 1.399915  | 1.222985  |
| H                                            | 1.041605  | 1.432411  | -1.118917 |
| H                                            | -1.233336 | -0.276669 | 1.395328  |
| Cl                                           | -2.970473 | -1.100467 | 0.046943  |

**Table S49** Optimized cartesian coordinates and total energies of *r-1, t-2, t-3, c-4-1eq, 2eq, 3ax,*

4ax-tetrachlorocyclohexane.

| <i>r-1, t-2, t-3, c-4-1eq, 2eq, 3ax, 4ax</i> |           |           |           |
|----------------------------------------------|-----------|-----------|-----------|
| <i>E(MP2/cc-pVTZ) = -2071.8058533 a.u.</i>   |           |           |           |
| atom                                         | X         | Y         | Z         |
| C                                            | -0.994265 | -0.625743 | 0.605842  |
| C                                            | -0.530959 | 0.237656  | -0.568193 |
| C                                            | 0.792000  | 0.949509  | -0.253065 |
| C                                            | 1.885347  | -0.043242 | 0.162282  |
| C                                            | 1.426436  | -0.940826 | 1.308748  |
| C                                            | 0.097280  | -1.630385 | 0.989518  |
| H                                            | 2.196535  | -1.691484 | 1.510046  |
| H                                            | 1.323880  | -0.319849 | 2.204937  |
| H                                            | 0.227573  | -2.337839 | 0.164302  |
| H                                            | -0.243232 | -2.201326 | 1.858794  |
| H                                            | -0.354286 | -0.414640 | -1.429426 |
| Cl                                           | -1.756538 | 1.422218  | -1.075774 |
| Cl                                           | 0.606637  | 2.139886  | 1.069199  |
| H                                            | 1.112969  | 1.510876  | -1.135058 |
| H                                            | 2.780876  | 0.517661  | 0.443166  |
| Cl                                           | 2.342972  | -1.025732 | -1.267854 |
| Cl                                           | -2.478567 | -1.522541 | 0.183821  |
| H                                            | -1.245924 | 0.019651  | 1.452779  |

**Table S50** Optimized cartesian coordinates and total energies of *r-1, t-2, c-3, t-4-1eq, 2eq, 3eq, 4eq*-tetrachlorocyclohexane.

| <i>r-1, t-2, c-3, t-4-1eq, 2eq, 3eq, 4eq</i> |           |           |           |
|----------------------------------------------|-----------|-----------|-----------|
| <i>E(MP2/cc-pVTZ) = -2071.8023087 a.u.</i>   |           |           |           |
| atom                                         | X         | Y         | Z         |
| C                                            | -0.252467 | 1.454629  | -0.783310 |
| C                                            | 0.190272  | 0.746234  | 0.501460  |
| C                                            | -0.190272 | -0.746234 | 0.501460  |
| C                                            | 0.252467  | -1.454629 | -0.783310 |
| C                                            | -0.252467 | -0.720799 | -2.021351 |
| C                                            | 0.252467  | 0.720799  | -2.021351 |
| H                                            | 0.094207  | -1.247136 | -2.915910 |
| H                                            | -1.348984 | -0.741957 | -2.031828 |
| H                                            | 1.348984  | 0.741957  | -2.031828 |
| H                                            | -0.094207 | 1.247136  | -2.915910 |
| H                                            | 1.277510  | 0.840405  | 0.603943  |
| Cl                                           | -0.544518 | 1.538845  | 1.919268  |
| Cl                                           | 0.345756  | 3.135747  | -0.803835 |
| H                                            | -1.347158 | 1.506682  | -0.799354 |
| H                                            | 1.347158  | -1.506682 | -0.799354 |
| Cl                                           | -0.345756 | -3.135747 | -0.803835 |
| Cl                                           | 0.544518  | -1.538845 | 1.919268  |
| H                                            | -1.277510 | -0.840405 | 0.603943  |

**Table S51** Optimized cartesian coordinates and total energies of *r-1, t-2, c-3, c-5-1ax, 2ax,*

3ax, 5ax-tetrachlorocyclohexane.

| <i>r-1, t-2, c-3, c-5-1ax, 2ax, 3ax, 5ax</i>         |           |           |           |
|------------------------------------------------------|-----------|-----------|-----------|
| $E(\text{MP2/cc-pVTZ}) = -2071.7945633 \text{ a.u.}$ |           |           |           |
| atom                                                 | X         | Y         | Z         |
| C                                                    | -0.595462 | -1.300844 | 0.148053  |
| C                                                    | -1.350266 | 0.000000  | 0.462370  |
| C                                                    | -0.595462 | 1.300844  | 0.148053  |
| C                                                    | 0.076503  | 1.269141  | -1.226129 |
| C                                                    | 0.867886  | 0.000000  | -1.552459 |
| C                                                    | 0.076503  | -1.269142 | -1.226129 |
| H                                                    | -1.330033 | 2.110141  | 0.149958  |
| H                                                    | -1.676426 | 0.000000  | 1.505578  |
| H                                                    | -1.330033 | -2.110141 | 0.149958  |
| H                                                    | -0.726821 | 1.337242  | -1.970620 |
| H                                                    | 0.713826  | 2.150021  | -1.341707 |
| H                                                    | 1.060729  | 0.000000  | -2.629267 |
| H                                                    | -0.726821 | -1.337242 | -1.970620 |
| H                                                    | 0.713826  | -2.150021 | -1.341706 |
| Cl                                                   | 0.539802  | -1.709708 | 1.466664  |
| Cl                                                   | -2.845757 | 0.000000  | -0.541036 |
| Cl                                                   | 0.539802  | 1.709709  | 1.466664  |
| Cl                                                   | 2.496951  | 0.000000  | -0.808418 |

**Table S52** Optimized cartesian coordinates and total energies of *r-1, t-2, c-3, t-5-1ax, 2ax, 3ax, 5eq*-tetrachlorocyclohexane.

| <i>r-1, t-2, c-3, t-5-1ax, 2ax, 3ax, 5eq</i>         |           |           |           |
|------------------------------------------------------|-----------|-----------|-----------|
| $E(\text{MP2/cc-pVTZ}) = -2071.8044259 \text{ a.u.}$ |           |           |           |
| atom                                                 | X         | Y         | Z         |
| C                                                    | -0.668210 | 0.119067  | -1.301068 |
| C                                                    | -1.390433 | 0.507858  | -0.000004 |
| C                                                    | -0.668209 | 0.119089  | 1.301066  |
| C                                                    | 0.830198  | 0.422781  | 1.254570  |
| C                                                    | 1.475994  | -0.156869 | 0.000001  |
| C                                                    | 0.830197  | 0.422760  | -1.254578 |
| H                                                    | -1.129266 | 0.679799  | 2.117916  |
| H                                                    | -2.405943 | 0.103036  | 0.000000  |
| H                                                    | -1.129267 | 0.679764  | -2.117927 |
| H                                                    | 0.969294  | 1.509812  | 1.252701  |
| H                                                    | 1.306348  | 0.019901  | 2.152720  |
| H                                                    | 0.969293  | 1.509791  | -1.252727 |
| H                                                    | 1.306347  | 0.019865  | -2.152721 |
| Cl                                                   | -0.946633 | -1.606358 | -1.694039 |
| Cl                                                   | -1.550744 | 2.298408  | -0.000019 |
| Cl                                                   | -0.946632 | -1.606330 | 1.694066  |
| Cl                                                   | 3.224282  | 0.215268  | -0.000003 |
| H                                                    | 1.391346  | -1.246857 | 0.000010  |

**Table S53** Optimized cartesian coordinates and total energies of *r-1, c-2, c-3, c-5-1ax, 2eq*,

3ax, 5ax-tetrachlorocyclohexane.

| <i>r-1, c-2, c-3, c-5-1ax, 2eq, 3ax, 5ax</i>         |           |           |           |
|------------------------------------------------------|-----------|-----------|-----------|
| $E(\text{MP2/cc-pVTZ}) = -2071.7891329 \text{ a.u.}$ |           |           |           |
| atom                                                 | X         | Y         | Z         |
| C                                                    | 0.418508  | -1.299323 | 0.564162  |
| C                                                    | 1.170007  | 0.000000  | 0.870777  |
| C                                                    | 0.418508  | 1.299323  | 0.564162  |
| C                                                    | -0.955462 | 1.268938  | 1.246004  |
| C                                                    | -1.783920 | 0.000000  | 1.022673  |
| C                                                    | -0.955462 | -1.268938 | 1.246004  |
| H                                                    | 0.996024  | -2.115541 | 1.008870  |
| H                                                    | -0.770012 | 1.333652  | 2.327862  |
| H                                                    | -1.529856 | 2.153429  | 0.956526  |
| H                                                    | -0.770012 | -1.333652 | 2.327862  |
| H                                                    | -1.529856 | -2.153429 | 0.956526  |
| Cl                                                   | 0.315440  | -1.698070 | -1.167465 |
| H                                                    | 1.281479  | 0.000000  | 1.964032  |
| Cl                                                   | 2.820280  | 0.000000  | 0.220278  |
| H                                                    | 0.996024  | 2.115541  | 1.008870  |
| Cl                                                   | 0.315440  | 1.698070  | -1.167465 |
| Cl                                                   | -2.625033 | 0.000000  | -0.555619 |
| H                                                    | -2.591009 | 0.000000  | 1.761366  |

**Table S54** Optimized cartesian coordinates and total energies of *r-1, c-2, c-3, t-5-1ax, 2eq, 3ax, 5eq*-tetrachlorocyclohexane.

| <i>r-1, c-2, c-3, t-5-1ax, 2eq, 3ax, 5eq</i>         |           |           |           |
|------------------------------------------------------|-----------|-----------|-----------|
| $E(\text{MP2/cc-pVTZ}) = -2071.8000125 \text{ a.u.}$ |           |           |           |
| atom                                                 | X         | Y         | Z         |
| C                                                    | -0.479161 | 0.364563  | 1.299572  |
| C                                                    | -1.070744 | 0.923877  | 0.000000  |
| C                                                    | -0.479161 | 0.364563  | -1.299572 |
| C                                                    | -0.479161 | -1.167770 | -1.254668 |
| C                                                    | 0.215318  | -1.689747 | 0.000000  |
| C                                                    | -0.479161 | -1.167770 | 1.254668  |
| H                                                    | -1.117581 | 0.700360  | 2.122119  |
| H                                                    | -1.519279 | -1.519364 | -1.251187 |
| H                                                    | 0.004965  | -1.556009 | -2.155144 |
| H                                                    | -1.519279 | -1.519364 | 1.251187  |
| H                                                    | 0.004965  | -1.556009 | 2.155144  |
| Cl                                                   | 1.153213  | 0.972940  | 1.684482  |
| H                                                    | -2.112007 | 0.573463  | 0.000000  |
| Cl                                                   | -1.155342 | 2.696242  | 0.000000  |
| Cl                                                   | 0.186608  | -3.477217 | 0.000000  |
| H                                                    | 1.267442  | -1.393130 | 0.000000  |
| H                                                    | -1.117581 | 0.700360  | -2.122119 |
| Cl                                                   | 1.153213  | 0.972940  | -1.684482 |

**Table S55** Optimized cartesian coordinates and total energies of *r-1, c-2, t-3, c-5-1ax, 2eq,*

3eq, 5ax-tetrachlorocyclohexane.

| <i>r-1, c-2, t-3, c-5-1ax, 2eq, 3eq, 5ax</i>         |           |           |           |
|------------------------------------------------------|-----------|-----------|-----------|
| $E(\text{MP2/cc-pVTZ}) = -2071.7992042 \text{ a.u.}$ |           |           |           |
| atom                                                 | X         | Y         | Z         |
| C                                                    | 0.263281  | 1.253050  | 0.800798  |
| C                                                    | -0.980388 | 0.370432  | 0.619462  |
| C                                                    | -0.658157 | -0.880175 | -0.199494 |
| C                                                    | 0.417914  | -1.691410 | 0.526837  |
| C                                                    | 1.701033  | -0.898615 | 0.770027  |
| C                                                    | 1.410920  | 0.453480  | 1.427605  |
| H                                                    | -0.000800 | 2.071855  | 1.476798  |
| H                                                    | 0.012780  | -1.997034 | 1.500617  |
| H                                                    | 0.640846  | -2.599520 | -0.039967 |
| H                                                    | 1.118193  | 0.238673  | 2.465077  |
| H                                                    | 2.314786  | 1.068593  | 1.459229  |
| Cl                                                   | 0.750785  | 2.036518  | -0.727510 |
| H                                                    | -0.331269 | -0.593231 | -1.202716 |
| Cl                                                   | -2.097885 | -1.916381 | -0.389021 |
| Cl                                                   | 2.637927  | -0.750905 | -0.749913 |
| H                                                    | 2.344876  | -1.472618 | 1.442786  |
| H                                                    | -1.291007 | 0.044687  | 1.620736  |
| Cl                                                   | -2.334122 | 1.313004  | -0.039083 |

**Table S56** Optimized cartesian coordinates and total energies of *r-1, c-2, t-3, t-5-1ax, 2eq, 3eq, 5eq*-tetrachlorocyclohexane.

| <i>r-1, c-2, t-3, t-5-1ax, 2eq, 3eq, 5eq</i>         |           |           |           |
|------------------------------------------------------|-----------|-----------|-----------|
| $E(\text{MP2/cc-pVTZ}) = -2071.8055229 \text{ a.u.}$ |           |           |           |
| atom                                                 | X         | Y         | Z         |
| C                                                    | 0.151991  | -1.356456 | 0.619142  |
| C                                                    | 1.033048  | -0.100660 | 0.634541  |
| C                                                    | 0.569793  | 0.915552  | -0.410583 |
| C                                                    | -0.908494 | 1.261711  | -0.194397 |
| C                                                    | -1.790036 | 0.014533  | -0.198002 |
| C                                                    | -1.315394 | -0.989519 | 0.848317  |
| H                                                    | 0.496438  | -2.032267 | 1.407382  |
| H                                                    | -1.015613 | 1.772329  | 0.769967  |
| H                                                    | -1.232609 | 1.956854  | -0.974856 |
| H                                                    | -1.412748 | -0.539008 | 1.844243  |
| H                                                    | -1.928562 | -1.894985 | 0.822749  |
| Cl                                                   | 0.319076  | -2.260366 | -0.917592 |
| H                                                    | 0.735839  | 0.506483  | -1.411539 |
| Cl                                                   | 1.521428  | 2.420734  | -0.301944 |
| H                                                    | 0.923052  | 0.354243  | 1.626942  |
| Cl                                                   | 2.748625  | -0.529681 | 0.459413  |
| Cl                                                   | -3.484778 | 0.478405  | 0.131247  |
| H                                                    | -1.785225 | -0.449186 | -1.188102 |

**Table S57** Optimized cartesian coordinates and total energies of *r-1, c-2, t-3, t-5-1eq, 2ax, 3ax,*

5ax-tetrachlorocyclohexane.

| <i>r-1, c-2, t-3, t-5-1eq, 2ax, 3ax, 5ax</i> |           |           |           |
|----------------------------------------------|-----------|-----------|-----------|
| <i>E</i> (MP2/cc-pVTZ) = -2071.8038244 a.u.  |           |           |           |
| atom                                         | X         | Y         | Z         |
| C                                            | 0.734085  | -0.690730 | -0.473427 |
| C                                            | 0.900409  | 0.817051  | -0.282651 |
| C                                            | -0.441453 | 1.464633  | 0.090874  |
| C                                            | -1.123357 | 0.756425  | 1.265325  |
| C                                            | -1.147334 | -0.774544 | 1.197180  |
| C                                            | 0.204828  | -1.364787 | 0.786614  |
| H                                            | -0.255725 | 2.505318  | 0.369093  |
| H                                            | 1.287178  | 1.271817  | -1.198521 |
| H                                            | -0.554235 | 1.022361  | 2.164633  |
| H                                            | -2.138708 | 1.143463  | 1.387875  |
| H                                            | -1.412608 | -1.153907 | 2.188177  |
| H                                            | 0.920367  | -1.217102 | 1.602583  |
| H                                            | 0.098679  | -2.439253 | 0.616230  |
| Cl                                           | 2.077137  | 1.196521  | 1.011029  |
| Cl                                           | -1.469582 | 1.540676  | -1.374000 |
| Cl                                           | -2.438993 | -1.384565 | 0.109048  |
| H                                            | 0.021181  | -0.829717 | -1.291718 |
| Cl                                           | 2.259132  | -1.443882 | -1.001480 |

**Table S58** Optimized cartesian coordinates and total energies of *r-1, c-2, t-3, t-5-1eq, 2ax, 3ax, 5eq*-tetrachlorocyclohexane.

| <i>r-1, c-2, t-3, t-5-1eq, 2ax, 3ax, 5eq</i> |           |           |           |
|----------------------------------------------|-----------|-----------|-----------|
| <i>E</i> (MP2/cc-pVTZ) = -2071.8080431 a.u.  |           |           |           |
| atom                                         | X         | Y         | Z         |
| C                                            | 0.898183  | -0.413766 | -0.779870 |
| C                                            | 1.154211  | 0.647493  | 0.293158  |
| C                                            | -0.097527 | 1.512873  | 0.504733  |
| C                                            | -1.347165 | 0.674329  | 0.777437  |
| C                                            | -1.549129 | -0.393089 | -0.296059 |
| C                                            | -0.314388 | -1.282437 | -0.451824 |
| H                                            | 0.083640  | 2.195169  | 1.339433  |
| H                                            | 1.996745  | 1.279901  | -0.000675 |
| H                                            | -1.232186 | 0.185619  | 1.750491  |
| H                                            | -2.220405 | 1.330950  | 0.826905  |
| H                                            | -0.136878 | -1.842270 | 0.471380  |
| H                                            | -0.475506 | -2.000801 | -1.261034 |
| Cl                                           | 1.584516  | -0.085308 | 1.864199  |
| Cl                                           | -0.334544 | 2.551509  | -0.941200 |
| Cl                                           | -2.971614 | -1.395045 | 0.113468  |
| H                                            | -1.779524 | 0.084488  | -1.253521 |
| Cl                                           | 2.344138  | -1.414157 | -1.062547 |
| H                                            | 0.716568  | 0.125534  | -1.715071 |

**Table S59** Optimized cartesian coordinates and total energies of *r-1, c-2, c-3, t-5-1eq, 2ax,*

3eq, 5ax-tetrachlorocyclohexane.

| <i>r-1, c-2, c-3, t-5-1eq, 2ax, 3eq, 5ax</i>         |           |           |           |
|------------------------------------------------------|-----------|-----------|-----------|
| $E(\text{MP2/cc-pVTZ}) = -2071.8070496 \text{ a.u.}$ |           |           |           |
| atom                                                 | X         | Y         | Z         |
| C                                                    | -1.239136 | -0.043274 | -0.432841 |
| C                                                    | 0.000001  | -0.946693 | -0.463145 |
| C                                                    | 1.239136  | -0.043272 | -0.432841 |
| C                                                    | 1.274132  | 0.827271  | 0.820175  |
| C                                                    | -0.000001 | 1.667638  | 0.938670  |
| C                                                    | -1.274134 | 0.827269  | 0.820175  |
| H                                                    | 0.000001  | -1.544523 | -1.379596 |
| H                                                    | 1.356672  | 0.185648  | 1.703845  |
| H                                                    | 2.147650  | 1.483959  | 0.790385  |
| H                                                    | -1.356673 | 0.185646  | 1.703845  |
| H                                                    | -2.147652 | 1.483956  | 0.790385  |
| Cl                                                   | 0.000002  | -2.100045 | 0.895705  |
| H                                                    | 1.185709  | 0.597043  | -1.319797 |
| Cl                                                   | 2.741179  | -0.985245 | -0.593993 |
| Cl                                                   | -0.000002 | 2.957813  | -0.317594 |
| H                                                    | -0.000002 | 2.193922  | 1.897463  |
| H                                                    | -1.185710 | 0.597042  | -1.319797 |
| Cl                                                   | -2.741178 | -0.985249 | -0.593993 |

**Table S60** Optimized cartesian coordinates and total energies of *r-1, c-2, c-3, c-5-1eq, 2ax, 3eq, 5eq*-tetrachlorocyclohexane.

| <i>r-1, c-2, c-3, c-5-1eq, 2ax, 3eq, 5eq</i>         |           |           |           |
|------------------------------------------------------|-----------|-----------|-----------|
| $E(\text{MP2/cc-pVTZ}) = -2071.8044316 \text{ a.u.}$ |           |           |           |
| atom                                                 | X         | Y         | Z         |
| C                                                    | 0.801517  | 0.150446  | 1.237638  |
| C                                                    | 0.673234  | 1.047703  | 0.000000  |
| C                                                    | 0.801517  | 0.150446  | -1.237638 |
| C                                                    | -0.274056 | -0.933906 | -1.271769 |
| C                                                    | -0.181925 | -1.778911 | 0.000000  |
| C                                                    | -0.274056 | -0.933906 | 1.271769  |
| H                                                    | 1.473073  | 1.794433  | 0.000000  |
| H                                                    | -1.264063 | -0.475521 | -1.348307 |
| H                                                    | -0.122580 | -1.570106 | -2.148523 |
| H                                                    | -1.264063 | -0.475521 | 1.348307  |
| H                                                    | -0.122580 | -1.570106 | 2.148523  |
| Cl                                                   | -0.864864 | 1.941865  | 0.000000  |
| Cl                                                   | -1.463360 | -3.023926 | 0.000000  |
| H                                                    | 0.769579  | -2.324931 | 0.000000  |
| H                                                    | 1.790749  | -0.321250 | -1.180123 |
| Cl                                                   | 0.801517  | 1.101414  | -2.742376 |
| Cl                                                   | 0.801517  | 1.101414  | 2.742376  |
| H                                                    | 1.790749  | -0.321250 | 1.180123  |

**Table S61** Optimized cartesian coordinates and total energies of *r-1, t-2, c-3, t-5-1eq, 2eq, 3eq*,

5ax-tetrachlorocyclohexane.

| <i>r-1, t-2, c-3, t-5-1eq, 2eq, 3eq, 5ax</i> |           |           |           |
|----------------------------------------------|-----------|-----------|-----------|
| <i>E(MP2/cc-pVTZ) = -2071.8058878 a.u.</i>   |           |           |           |
| atom                                         | X         | Y         | Z         |
| C                                            | 0.001653  | 0.070428  | 1.265200  |
| C                                            | -0.370007 | 0.854812  | 0.000000  |
| C                                            | 0.001653  | 0.070428  | -1.265200 |
| C                                            | -0.590071 | -1.338907 | -1.254131 |
| C                                            | -0.195204 | -2.111160 | 0.000000  |
| C                                            | -0.590071 | -1.338907 | 1.254131  |
| H                                            | -1.684770 | -1.266177 | -1.277435 |
| H                                            | -0.269468 | -1.874220 | -2.152448 |
| H                                            | -1.684770 | -1.266177 | 1.277435  |
| H                                            | -0.269468 | -1.874220 | 2.152448  |
| H                                            | 1.091503  | 0.025946  | -1.347121 |
| Cl                                           | -0.590071 | 0.918781  | -2.720458 |
| Cl                                           | 1.568926  | -2.447631 | 0.000000  |
| H                                            | -0.686411 | -3.088634 | 0.000000  |
| H                                            | -1.449090 | 1.049788  | 0.000000  |
| Cl                                           | 0.453172  | 2.435220  | 0.000000  |
| H                                            | 1.091503  | 0.025946  | 1.347121  |
| Cl                                           | -0.590071 | 0.918781  | 2.720458  |

**Table S62** Optimized cartesian coordinates and total energies of *r-1, t-2, c-3, c-5-1eq, 2eq, 3eq, 5eq*-tetrachlorocyclohexane.

| <i>r-1, t-2, c-3, c-5-1eq, 2eq, 3eq, 5eq</i> |           |           |           |
|----------------------------------------------|-----------|-----------|-----------|
| <i>E(MP2/cc-pVTZ) = -2071.8042903 a.u.</i>   |           |           |           |
| atom                                         | X         | Y         | Z         |
| C                                            | 0.302142  | 1.261117  | 0.299433  |
| C                                            | 1.032558  | 0.000000  | -0.180239 |
| C                                            | 0.302143  | -1.261117 | 0.299433  |
| C                                            | -1.176946 | -1.251184 | -0.090087 |
| C                                            | -1.856392 | 0.000000  | 0.453797  |
| C                                            | -1.176947 | 1.251184  | -0.090087 |
| H                                            | -1.270525 | -1.268357 | -1.182021 |
| H                                            | -1.657297 | -2.152375 | 0.302386  |
| H                                            | -1.270525 | 1.268356  | -1.182021 |
| H                                            | -1.657297 | 2.152375  | 0.302386  |
| H                                            | 0.404638  | -1.329058 | 1.388940  |
| Cl                                           | 1.063604  | -2.725028 | -0.379060 |
| H                                            | 1.076899  | 0.000000  | -1.275425 |
| Cl                                           | 2.708836  | 0.000000  | 0.423023  |
| Cl                                           | -3.587489 | 0.000000  | 0.014728  |
| H                                            | -1.815299 | 0.000000  | 1.549586  |
| Cl                                           | 1.063603  | 2.725028  | -0.379060 |
| H                                            | 0.404637  | 1.329058  | 1.388940  |

**Table S63** Optimized cartesian coordinates and total energies of *r-1, t-2, t-4, c-5-1ax, 2ax, 4ax,*

## 5ax-tetrachlorocyclohexane.

| <i>r-1, t-2, t-4, c-5-1ax, 2ax, 4ax, 5ax</i>         |           |           |           |
|------------------------------------------------------|-----------|-----------|-----------|
| $E(\text{MP2/cc-pVTZ}) = -2071.7993462 \text{ a.u.}$ |           |           |           |
| atom                                                 | X         | Y         | Z         |
| C                                                    | -0.000004 | -0.767316 | 1.297418  |
| C                                                    | -0.000004 | 0.767313  | 1.297429  |
| C                                                    | 0.557820  | 1.355800  | 0.000000  |
| C                                                    | -0.000004 | 0.767313  | -1.297429 |
| C                                                    | -0.000004 | -0.767316 | -1.297418 |
| C                                                    | -0.557872 | -1.355779 | 0.000000  |
| H                                                    | 0.422584  | 2.441065  | 0.000000  |
| H                                                    | 0.614125  | 1.117023  | 2.130874  |
| H                                                    | -0.614096 | -1.117045 | 2.130883  |
| H                                                    | 0.614125  | 1.117023  | -2.130874 |
| H                                                    | -0.614096 | -1.117045 | -2.130883 |
| H                                                    | -1.635527 | -1.149873 | 0.000000  |
| H                                                    | -0.422673 | -2.441048 | 0.000000  |
| H                                                    | 1.635483  | 1.149936  | 0.000000  |
| Cl                                                   | 1.660181  | -1.336245 | 1.665276  |
| Cl                                                   | -1.660166 | 1.336242  | 1.665392  |
| Cl                                                   | -1.660166 | 1.336242  | -1.665392 |
| Cl                                                   | 1.660181  | -1.336245 | -1.665276 |

**Table S64** Optimized cartesian coordinates and total energies of *r-1, t-2, t-4, c-5-1ax, 2ax, 4ax, 5eq*-tetrachlorocyclohexane.

| <i>r-1, t-2, t-4, c-5-1ax, 2ax, 4ax, 5eq</i>         |           |           |           |
|------------------------------------------------------|-----------|-----------|-----------|
| $E(\text{MP2/cc-pVTZ}) = -2071.8032098 \text{ a.u.}$ |           |           |           |
| atom                                                 | X         | Y         | Z         |
| C                                                    | -1.392089 | -0.671398 | -0.586318 |
| C                                                    | -1.583046 | 0.541584  | 0.332406  |
| C                                                    | -0.525348 | 0.613227  | 1.438909  |
| C                                                    | 0.925614  | 0.374361  | 0.995037  |
| C                                                    | 1.001408  | -0.889391 | 0.135737  |
| C                                                    | 0.053986  | -0.827181 | -1.057693 |
| H                                                    | -0.597193 | 1.574435  | 1.955542  |
| H                                                    | -2.569994 | 0.480217  | 0.798375  |
| H                                                    | -2.062578 | -0.584534 | -1.445038 |
| H                                                    | 1.540831  | 0.232231  | 1.888710  |
| H                                                    | 0.314767  | 0.025234  | -1.693585 |
| H                                                    | 0.143593  | -1.742263 | -1.649346 |
| H                                                    | -0.771486 | -0.173420 | 2.163377  |
| Cl                                                   | -1.920899 | -2.142255 | 0.303755  |
| Cl                                                   | -1.630502 | 2.012896  | -0.686946 |
| Cl                                                   | 1.618070  | 1.794491  | 0.162814  |
| Cl                                                   | 2.663572  | -1.249728 | -0.388421 |
| H                                                    | 0.704799  | -1.721003 | 0.783064  |

**Table S65** Optimized cartesian coordinates and total energies of *r-1, t-2, c-4, t-5-1ax, 2ax, 4eq*,

## 5eq-tetrachlorocyclohexane.

| <i>r-1, t-2, c-4, t-5-1ax, 2ax, 4eq, 5eq</i> |           |           |           |
|----------------------------------------------|-----------|-----------|-----------|
| <i>E(MP2/cc-pVTZ) = -2071.8091573 a.u.</i>   |           |           |           |
| atom                                         | X         | Y         | Z         |
| C                                            | 0.665017  | 0.379666  | -1.630542 |
| C                                            | -0.665017 | -0.379666 | -1.630542 |
| C                                            | -0.855772 | -1.195165 | -0.354417 |
| C                                            | -0.679197 | -0.349862 | 0.910381  |
| C                                            | 0.679197  | 0.349862  | 0.910381  |
| C                                            | 0.855772  | 1.195165  | -0.354417 |
| H                                            | -1.852687 | -1.644793 | -0.352347 |
| H                                            | -0.714214 | -1.034826 | -2.504707 |
| H                                            | 0.714214  | 1.034826  | -2.504707 |
| H                                            | 0.120677  | 2.006797  | -0.346698 |
| H                                            | 1.852687  | 1.644793  | -0.352347 |
| H                                            | -0.120677 | -2.006797 | -0.346698 |
| Cl                                           | 1.993579  | -0.811556 | -1.820108 |
| Cl                                           | -1.993579 | 0.811556  | -1.820108 |
| Cl                                           | 0.855772  | 1.417179  | 2.330020  |
| H                                            | 1.468426  | -0.404709 | 0.982716  |
| H                                            | -1.468426 | 0.404709  | 0.982716  |
| Cl                                           | -0.855772 | -1.417179 | 2.330020  |

**Table S66** Optimized cartesian coordinates and total energies of *r-1, c-2, t-4, t-5-1ax, 2eq, 4ax, 5eq-tetrachlorocyclohexane*.

| <i>r-1, c-2, t-4, t-5-1ax, 2eq, 4ax, 5eq</i> |           |           |           |
|----------------------------------------------|-----------|-----------|-----------|
| <i>E(MP2/cc-pVTZ) = -2071.8073740 a.u.</i>   |           |           |           |
| atom                                         | X         | Y         | Z         |
| C                                            | 1.013988  | -0.736682 | 0.799953  |
| C                                            | 1.259033  | 0.683415  | 0.286046  |
| C                                            | 0.488785  | 0.967151  | -1.001363 |
| C                                            | -1.013988 | 0.736682  | -0.799953 |
| C                                            | -1.259033 | -0.683415 | -0.286046 |
| C                                            | -0.488785 | -0.967151 | 1.001363  |
| H                                            | 0.656897  | 2.001353  | -1.313679 |
| H                                            | 1.542342  | -0.877096 | 1.747596  |
| H                                            | -0.849480 | -0.305737 | 1.796770  |
| H                                            | -0.656897 | -2.001353 | 1.313679  |
| H                                            | 0.849480  | 0.305737  | -1.796770 |
| Cl                                           | 1.673006  | -1.970169 | -0.319443 |
| H                                            | -1.542342 | 0.877096  | -1.747596 |
| Cl                                           | -1.673006 | 1.970169  | 0.319443  |
| Cl                                           | 2.992931  | 1.026918  | 0.072870  |
| H                                            | 0.908185  | 1.360224  | 1.071928  |
| H                                            | -0.908185 | -1.360224 | -1.071928 |
| Cl                                           | -2.992931 | -1.026918 | -0.072870 |

**Table S67** Optimized cartesian coordinates and total energies of *r-1, c-2, c-4, c-5-1ax, 2eq,*

4eq, 5ax-tetrachlorocyclohexane.

| <i>r-1, c-2, c-4, c-5-1ax, 2eq, 4eq, 5ax</i>         |           |           |           |
|------------------------------------------------------|-----------|-----------|-----------|
| $E(\text{MP2/cc-pVTZ}) = -2071.7986391 \text{ a.u.}$ |           |           |           |
| atom                                                 | X         | Y         | Z         |
| C                                                    | 0.619753  | -0.821164 | 1.302877  |
| C                                                    | -0.870607 | -0.477025 | 1.234166  |
| C                                                    | -1.216204 | 0.353511  | 0.000000  |
| C                                                    | -0.870607 | -0.477025 | -1.234166 |
| C                                                    | 0.619753  | -0.821164 | -1.302877 |
| C                                                    | 1.049849  | -1.513392 | 0.000000  |
| H                                                    | -2.287282 | 0.573620  | 0.000000  |
| H                                                    | 0.783664  | -1.516773 | 2.131513  |
| H                                                    | 0.585476  | -2.509552 | 0.000000  |
| H                                                    | 2.134183  | -1.656766 | 0.000000  |
| H                                                    | -0.664615 | 1.297995  | 0.000000  |
| Cl                                                   | 1.618536  | 0.607810  | 1.675549  |
| Cl                                                   | -1.457466 | 0.296228  | 2.725182  |
| H                                                    | -1.401544 | -1.435739 | 1.168277  |
| Cl                                                   | -1.457466 | 0.296228  | -2.725182 |
| H                                                    | -1.401544 | -1.435739 | -1.168277 |
| H                                                    | 0.783664  | -1.516773 | -2.131513 |
| Cl                                                   | 1.618536  | 0.607810  | -1.675549 |

**Table S68** Optimized cartesian coordinates and total energies of *r-1, c-2, c-4, t-5-1ax, 2eq, 4eq, 5eq*-tetrachlorocyclohexane.

| <i>r-1, c-2, c-4, t-5-1ax, 2eq, 4eq, 5eq</i>         |           |           |           |
|------------------------------------------------------|-----------|-----------|-----------|
| $E(\text{MP2/cc-pVTZ}) = -2071.8060877 \text{ a.u.}$ |           |           |           |
| atom                                                 | X         | Y         | Z         |
| C                                                    | -1.235892 | -1.068389 | -0.408189 |
| C                                                    | -1.414892 | 0.412341  | -0.742796 |
| C                                                    | -0.428310 | 1.286395  | 0.025625  |
| C                                                    | 1.012342  | 0.860173  | -0.278709 |
| C                                                    | 1.230515  | -0.623158 | 0.019454  |
| C                                                    | 0.202684  | -1.479816 | -0.726139 |
| H                                                    | -0.557352 | 2.332078  | -0.267717 |
| H                                                    | -1.934007 | -1.666830 | -1.001173 |
| H                                                    | 0.365798  | -1.371657 | -1.806022 |
| H                                                    | 0.351582  | -2.532864 | -0.470938 |
| H                                                    | -0.622136 | 1.210858  | 1.099517  |
| Cl                                                   | -1.609137 | -1.413108 | 1.305460  |
| Cl                                                   | -3.087800 | 0.963672  | -0.486254 |
| H                                                    | -1.223482 | 0.507458  | -1.819094 |
| H                                                    | 1.157022  | -0.787029 | 1.098315  |
| Cl                                                   | 2.864849  | -1.142479 | -0.475264 |
| Cl                                                   | 2.127535  | 1.882703  | 0.665934  |
| H                                                    | 1.241291  | 1.039331  | -1.336258 |

**Table S69** Optimized cartesian coordinates and total energies of *r-1, t-2, t-4, c-5-1eq, 2eq, 4eq*,

5eq-tetrachlorocyclohexane.

| <i>r-1, t-2, t-4, c-5-1eq, 2eq, 4eq, 5eq</i> |           |           |           |
|----------------------------------------------|-----------|-----------|-----------|
| <i>E(MP2/cc-pVTZ) = -2071.8056158 a.u.</i>   |           |           |           |
| atom                                         | X         | Y         | Z         |
| C                                            | -0.604985 | 0.465306  | 1.268979  |
| C                                            | 0.604985  | -0.465306 | 1.268979  |
| C                                            | 0.610323  | -1.320212 | 0.000000  |
| C                                            | 0.604985  | -0.465306 | -1.268979 |
| C                                            | -0.604985 | 0.465306  | -1.268979 |
| C                                            | -0.610323 | 1.320212  | 0.000000  |
| H                                            | 1.493487  | -1.965475 | 0.000000  |
| H                                            | 0.271298  | 1.971949  | 0.000000  |
| H                                            | -1.493487 | 1.965475  | 0.000000  |
| H                                            | -0.271298 | -1.971949 | 0.000000  |
| Cl                                           | 0.604985  | -1.543427 | 2.688720  |
| H                                            | 1.515815  | 0.141740  | 1.328461  |
| H                                            | -1.515815 | -0.141740 | -1.328461 |
| Cl                                           | -0.604985 | 1.543427  | -2.688720 |
| Cl                                           | 0.604985  | -1.543427 | -2.688720 |
| H                                            | 1.515815  | 0.141740  | -1.328461 |
| H                                            | -1.515815 | -0.141740 | 1.328461  |
| Cl                                           | -0.604985 | 1.543427  | 2.688720  |

**Table S70** Optimized cartesian coordinates and total energies of *r-1, t-2, c-3, t-4, c-5-1ax, 2ax, 3ax, 4ax, 5ax*-pentachlorocyclohexane.

| <i>r-1, t-2, c-3, t-4, c-5-1ax, 2ax, 3ax, 4ax, 5ax</i> |           |           |           |
|--------------------------------------------------------|-----------|-----------|-----------|
| <i>E(MP2/cc-pVTZ) = -2530.9064277 a.u.</i>             |           |           |           |
| atom                                                   | X         | Y         | Z         |
| C                                                      | -0.267852 | -0.950181 | 1.294586  |
| C                                                      | -0.267852 | 0.586512  | 1.304673  |
| C                                                      | 0.198759  | 1.260220  | 0.000000  |
| C                                                      | -0.267852 | 0.586512  | -1.304673 |
| C                                                      | -0.267852 | -0.950181 | -1.294586 |
| C                                                      | -0.839684 | -1.525521 | 0.000000  |
| H                                                      | -0.171961 | 2.287666  | 0.000000  |
| H                                                      | 0.363714  | 0.943789  | 2.121042  |
| H                                                      | -0.902075 | -1.278683 | 2.121108  |
| H                                                      | 0.363714  | 0.943789  | -2.121042 |
| H                                                      | -0.902075 | -1.278683 | -2.121108 |
| H                                                      | -1.913130 | -1.299453 | 0.000000  |
| H                                                      | -0.723143 | -2.612615 | 0.000000  |
| Cl                                                     | 1.357513  | -1.585363 | 1.685430  |
| Cl                                                     | -1.932744 | 1.128619  | 1.701185  |
| Cl                                                     | -1.932744 | 1.128619  | -1.701185 |
| Cl                                                     | 1.357513  | -1.585363 | -1.685430 |
| Cl                                                     | 1.983342  | 1.398784  | 0.000000  |

**Table S71** Optimized cartesian coordinates and total energies of *r-1, t-2, c-3, t-4, t-5-1ax, 2ax,*

3ax, 4ax, 5eq-pentachlorocyclohexane.

| <i>r-1, t-2, c-3, t-4, t-5-1ax, 2ax, 3ax, 4ax, 5eq</i> |           |           |           |
|--------------------------------------------------------|-----------|-----------|-----------|
| <i>E(MP2/cc-pVTZ) = -2530.9146514 a.u.</i>             |           |           |           |
| atom                                                   | X         | Y         | Z         |
| C                                                      | -1.111588 | -0.437107 | -1.195918 |
| C                                                      | -1.414021 | 0.665497  | -0.166185 |
| C                                                      | -0.513061 | 0.669644  | 1.086683  |
| C                                                      | 0.967496  | 0.318862  | 0.842035  |
| C                                                      | 1.085730  | -0.891980 | -0.083231 |
| C                                                      | 0.385931  | -0.649121 | -1.414198 |
| H                                                      | -0.570043 | 1.657564  | 1.549365  |
| H                                                      | -2.453410 | 0.582488  | 0.159470  |
| H                                                      | -1.586063 | -0.153901 | -2.138159 |
| H                                                      | 1.426902  | 0.090770  | 1.807104  |
| H                                                      | 0.810671  | 0.235515  | -1.899697 |
| H                                                      | 0.531335  | -1.509214 | -2.072625 |
| Cl                                                     | -1.892848 | -1.978409 | -0.715232 |
| Cl                                                     | -1.290743 | 2.243550  | -1.007273 |
| Cl                                                     | 1.843434  | 1.736317  | 0.203703  |
| Cl                                                     | -1.159754 | -0.478415 | 2.302760  |
| Cl                                                     | 2.783943  | -1.359828 | -0.328102 |
| H                                                      | 0.609129  | -1.732646 | 0.429877  |

**Table S72** Optimized cartesian coordinates and total energies of *r-1, t-2, c-3, c-4, c-5-1ax, 2ax, 3ax, 4eq, 5ax*-pentachlorocyclohexane.

| <i>r-1, t-2, c-3, c-4, c-5-1ax, 2ax, 3ax, 4eq, 5ax</i> |           |           |           |
|--------------------------------------------------------|-----------|-----------|-----------|
| <i>E(MP2/cc-pVTZ) = -2530.9073053 a.u.</i>             |           |           |           |
| atom                                                   | X         | Y         | Z         |
| C                                                      | 1.671618  | 0.537387  | -0.482527 |
| C                                                      | 1.426077  | -0.687943 | 0.412231  |
| C                                                      | -0.046074 | -0.971212 | 0.763380  |
| C                                                      | -0.922619 | -0.894203 | -0.490742 |
| C                                                      | -0.776490 | 0.375801  | -1.333146 |
| C                                                      | 0.703342  | 0.604032  | -1.665796 |
| H                                                      | -0.103120 | -1.995163 | 1.142278  |
| H                                                      | 2.006482  | -0.599041 | 1.333870  |
| H                                                      | 2.685937  | 0.448689  | -0.879413 |
| H                                                      | 0.999308  | -0.188387 | -2.364919 |
| H                                                      | 0.819103  | 1.561708  | -2.180357 |
| Cl                                                     | 1.689076  | 2.038221  | 0.485973  |
| Cl                                                     | 2.069030  | -2.127224 | -0.456787 |
| Cl                                                     | -0.583601 | 0.062308  | 2.106806  |
| H                                                      | -0.556280 | -1.699792 | -1.138169 |
| Cl                                                     | -2.614240 | -1.291813 | -0.140324 |
| Cl                                                     | -1.553240 | 1.818044  | -0.634488 |
| H                                                      | -1.305998 | 0.196701  | -2.273757 |

**Table S73** Optimized cartesian coordinates and total energies of *r-1, t-2, c-3, c-4, t-5-1ax, 2ax,*

3ax, 4eq, 5eq-pentachlorocyclohexane.

| <i>r-1, t-2, c-3, c-4, t-5-1ax, 2ax, 3ax, 4eq, 5eq</i> |           |           |           |
|--------------------------------------------------------|-----------|-----------|-----------|
| <i>E</i> (MP2/cc-pVTZ) = -2530.9163350 a.u.            |           |           |           |
| atom                                                   | X         | Y         | Z         |
| C                                                      | -1.573524 | 0.983394  | 0.107127  |
| C                                                      | -1.538321 | -0.487537 | 0.550884  |
| C                                                      | -0.274005 | -1.263273 | 0.144017  |
| C                                                      | 1.003711  | -0.465228 | 0.444930  |
| C                                                      | 0.955461  | 0.919368  | -0.200899 |
| C                                                      | -0.243997 | 1.692035  | 0.353772  |
| H                                                      | -0.244601 | -2.192604 | 0.718994  |
| H                                                      | -2.421434 | -1.014749 | 0.180930  |
| H                                                      | -2.359937 | 1.483501  | 0.677624  |
| H                                                      | -0.106221 | 1.815194  | 1.433987  |
| H                                                      | -0.276867 | 2.688341  | -0.094937 |
| Cl                                                     | -2.061603 | 1.137221  | -1.607336 |
| Cl                                                     | -1.639918 | -0.511385 | 2.344539  |
| Cl                                                     | -0.374264 | -1.750785 | -1.568410 |
| Cl                                                     | 2.430196  | 1.851141  | 0.166100  |
| H                                                      | 0.898816  | 0.821755  | -1.288649 |
| H                                                      | 1.058845  | -0.332313 | 1.530879  |
| Cl                                                     | 2.438262  | -1.405113 | -0.014764 |

**Table S74** Optimized cartesian coordinates and total energies of *r-1, t-2, t-3, t-4, c-5-1ax, 2ax, 3eq, 4ax, 5ax*-pentachlorocyclohexane.

| <i>r-1, t-2, t-3, t-4, c-5-1ax, 2ax, 3eq, 4ax, 5ax</i> |           |           |           |
|--------------------------------------------------------|-----------|-----------|-----------|
| <i>E</i> (MP2/cc-pVTZ) = -2530.9123900 a.u.            |           |           |           |
| atom                                                   | X         | Y         | Z         |
| C                                                      | -0.089338 | -1.152887 | 1.297356  |
| C                                                      | -0.089338 | 0.384672  | 1.299953  |
| C                                                      | 0.511562  | 0.926178  | 0.000000  |
| C                                                      | -0.089338 | 0.384672  | -1.299953 |
| C                                                      | -0.089338 | -1.152887 | -1.297356 |
| C                                                      | -0.649978 | -1.738596 | 0.000000  |
| H                                                      | 0.528689  | 0.737660  | 2.129478  |
| H                                                      | -0.710142 | -1.493377 | 2.129418  |
| H                                                      | -1.726890 | -1.529426 | 0.000000  |
| H                                                      | -0.518193 | -2.824124 | 0.000000  |
| Cl                                                     | 1.563466  | -1.734682 | 1.674256  |
| Cl                                                     | -1.742798 | 0.955914  | 1.648264  |
| H                                                      | 1.549189  | 0.571236  | 0.000000  |
| Cl                                                     | 0.595925  | 2.697938  | 0.000000  |
| H                                                      | 0.528689  | 0.737660  | -2.129478 |
| Cl                                                     | -1.742798 | 0.955914  | -1.648264 |
| Cl                                                     | 1.563466  | -1.734682 | -1.674256 |
| H                                                      | -0.710142 | -1.493377 | -2.129418 |

**Table S75** Optimized cartesian coordinates and total energies of *r-1, t-2, t-3, t-4, t-5-1ax, 2ax,*

3eq, 4ax, 5eq-pentachlorocyclohexane.

| <i>r-1, t-2, t-3, t-4, t-5-1ax, 2ax, 3eq, 4ax, 5eq</i> |           |           |           |
|--------------------------------------------------------|-----------|-----------|-----------|
| <i>E</i> (MP2/cc-pVTZ) = -2530.9154706 a.u.            |           |           |           |
| atom                                                   | X         | Y         | Z         |
| C                                                      | -0.061583 | 1.710645  | 0.634711  |
| C                                                      | -1.252989 | 0.833410  | 0.219095  |
| C                                                      | -0.851238 | -0.129496 | -0.906075 |
| C                                                      | 0.431545  | -0.942092 | -0.667854 |
| C                                                      | 1.554857  | 0.044423  | -0.321299 |
| C                                                      | 1.207025  | 0.897743  | 0.893732  |
| H                                                      | -2.054396 | 1.474161  | -0.158352 |
| H                                                      | -0.337287 | 2.272279  | 1.530501  |
| H                                                      | 1.046652  | 0.253583  | 1.764456  |
| H                                                      | 2.031948  | 1.580386  | 1.114064  |
| Cl                                                     | 0.229058  | 2.939210  | -0.645239 |
| Cl                                                     | -1.902887 | 0.043686  | 1.677300  |
| H                                                      | -0.625815 | 0.516791  | -1.763036 |
| Cl                                                     | -2.206450 | -1.152423 | -1.418039 |
| Cl                                                     | 3.115328  | -0.778849 | -0.099876 |
| H                                                      | 1.682613  | 0.694969  | -1.192736 |
| H                                                      | 0.680855  | -1.452874 | -1.603081 |
| Cl                                                     | 0.259641  | -2.217923 | 0.556107  |

**Table S76** Optimized cartesian coordinates and total energies of *r-1, t-2, t-3, c-4, c-5-1ax, 2ax, 3eq, 4eq, 5ax*-pentachlorocyclohexane.

| <i>r-1, t-2, t-3, c-4, c-5-1ax, 2ax, 3eq, 4eq, 5ax</i> |           |           |           |
|--------------------------------------------------------|-----------|-----------|-----------|
| <i>E</i> (MP2/cc-pVTZ) = -2530.9150963 a.u.            |           |           |           |
| atom                                                   | X         | Y         | Z         |
| C                                                      | -1.523816 | -1.102582 | 0.283081  |
| C                                                      | -0.122187 | -1.497900 | -0.196218 |
| C                                                      | 0.707259  | -0.271557 | -0.601535 |
| C                                                      | 0.832171  | 0.698694  | 0.575628  |
| C                                                      | -0.554737 | 1.179473  | 1.031082  |
| C                                                      | -1.475020 | -0.005062 | 1.348440  |
| H                                                      | -0.200924 | -2.175565 | -1.050207 |
| H                                                      | -2.000588 | -1.986763 | 0.713508  |
| H                                                      | -1.099215 | -0.470968 | 2.267574  |
| H                                                      | -2.484956 | 0.362112  | 1.549922  |
| Cl                                                     | -2.518674 | -0.672919 | -1.140568 |
| Cl                                                     | 0.666576  | -2.426538 | 1.116231  |
| H                                                      | 1.285477  | 0.166346  | 1.418120  |
| Cl                                                     | 1.897911  | 2.074087  | 0.227140  |
| Cl                                                     | -1.296594 | 2.295624  | -0.150759 |
| H                                                      | -0.422117 | 1.768937  | 1.943073  |
| H                                                      | 0.185487  | 0.227168  | -1.424574 |
| Cl                                                     | 2.283417  | -0.793647 | -1.232060 |

**Table S77** Optimized cartesian coordinates and total energies of *r-1, t-2, t-3, c-4, t-5-1ax, 2ax,*

3eq, 4eq, 5eq-pentachlorocyclohexane.

| <i>r-1, t-2, t-3, c-4, t-5-1ax, 2ax, 3eq, 4eq, 5eq</i> |           |           |           |
|--------------------------------------------------------|-----------|-----------|-----------|
| <i>E</i> (MP2/cc-pVTZ) = -2530.9208532 a.u.            |           |           |           |
| atom                                                   | X         | Y         | Z         |
| C                                                      | 1.051710  | -1.651615 | 0.028658  |
| C                                                      | 1.609190  | -0.228188 | 0.124749  |
| C                                                      | 0.651438  | 0.785059  | -0.509912 |
| C                                                      | -0.756864 | 0.715944  | 0.095491  |
| C                                                      | -1.302255 | -0.716927 | 0.012281  |
| C                                                      | -0.349023 | -1.744261 | 0.623398  |
| H                                                      | 2.576568  | -0.169016 | -0.381993 |
| H                                                      | 1.727706  | -2.333614 | 0.551269  |
| H                                                      | -0.282645 | -1.579652 | 1.703167  |
| H                                                      | -0.752831 | -2.747178 | 0.459818  |
| Cl                                                     | 1.051268  | -2.163812 | -1.690360 |
| Cl                                                     | 1.907086  | 0.128129  | 1.850036  |
| H                                                      | -0.733303 | 1.048225  | 1.137984  |
| Cl                                                     | -1.841263 | 1.818038  | -0.789615 |
| H                                                      | 0.581986  | 0.545419  | -1.575776 |
| Cl                                                     | 1.338847  | 2.421171  | -0.407352 |
| Cl                                                     | -2.870631 | -0.837101 | 0.854736  |
| H                                                      | -1.492882 | -0.953484 | -1.039045 |

**Table S78** Optimized cartesian coordinates and total energies of *r-1, c-2, c-3, t-4, t-5-1ax, 2eq, 3ax, 4ax, 5eq*-pentachlorocyclohexane.

| <i>r-1, c-2, c-3, t-4, t-5-1ax, 2eq, 3ax, 4ax, 5eq</i> |           |           |           |
|--------------------------------------------------------|-----------|-----------|-----------|
| <i>E</i> (MP2/cc-pVTZ) = -2530.9164275 a.u.            |           |           |           |
| atom                                                   | X         | Y         | Z         |
| C                                                      | 0.762286  | 0.908600  | -1.081624 |
| C                                                      | 1.090041  | -0.546899 | -0.729164 |
| C                                                      | 0.405728  | -1.103379 | 0.526154  |
| C                                                      | -1.107968 | -0.827723 | 0.485867  |
| C                                                      | -1.376800 | 0.655369  | 0.226087  |
| C                                                      | -0.756574 | 1.122059  | -1.086005 |
| H                                                      | 0.562872  | -2.185202 | 0.543547  |
| H                                                      | 1.154566  | 1.098486  | -2.084965 |
| H                                                      | -1.550693 | -1.127545 | 1.439261  |
| H                                                      | -1.198369 | 0.563343  | -1.918189 |
| H                                                      | -0.966594 | 2.183699  | -1.238808 |
| Cl                                                     | 1.551849  | 2.112905  | -0.025877 |
| Cl                                                     | -1.846276 | -1.870653 | -0.766158 |
| Cl                                                     | 1.061073  | -0.488151 | 2.064671  |
| Cl                                                     | -3.120076 | 1.010217  | 0.263649  |
| H                                                      | -0.930067 | 1.207941  | 1.058207  |
| Cl                                                     | 2.833028  | -0.873456 | -0.729802 |
| H                                                      | 0.674840  | -1.133550 | -1.557139 |

**Table S79** Optimized cartesian coordinates and total energies of *r-1, c-2, c-3, c-4, c-5-1ax,*

2eq, 3ax, 4eq, 5ax-pentachlorocyclohexane.

| <i>r-1, c-2, c-3, c-4, c-5-1ax, 2eq, 3ax, 4eq, 5ax</i> |           |           |           |
|--------------------------------------------------------|-----------|-----------|-----------|
| <i>E</i> (MP2/cc-pVTZ) = -2530.9014923 a.u.            |           |           |           |
| atom                                                   | X         | Y         | Z         |
| C                                                      | 1.301421  | 0.926841  | -0.868652 |
| C                                                      | 1.240216  | -0.604479 | -0.845127 |
| C                                                      | 0.000000  | -1.214607 | -0.174664 |
| C                                                      | -1.240216 | -0.604479 | -0.845127 |
| C                                                      | -1.301422 | 0.926841  | -0.868652 |
| C                                                      | 0.000000  | 1.485030  | -1.459760 |
| H                                                      | 0.000000  | -2.284417 | -0.405974 |
| H                                                      | 2.118195  | 1.201915  | -1.542817 |
| H                                                      | 0.000000  | 1.228973  | -2.528790 |
| H                                                      | 0.000000  | 2.575823  | -1.383253 |
| Cl                                                     | 1.720599  | 1.671290  | 0.691495  |
| Cl                                                     | 0.000000  | -1.110006 | 1.593144  |
| H                                                      | -1.160114 | -0.894035 | -1.901941 |
| Cl                                                     | -2.744525 | -1.340611 | -0.265142 |
| Cl                                                     | -1.720599 | 1.671290  | 0.691495  |
| H                                                      | -2.118195 | 1.201915  | -1.542817 |
| H                                                      | 1.160114  | -0.894034 | -1.901941 |
| Cl                                                     | 2.744525  | -1.340611 | -0.265142 |

**Table S80** Optimized cartesian coordinates and total energies of *r-1, c-2, c-3, c-4, t-5-1ax, 2eq, 3ax, 4eq, 5eq-pentachlorocyclohexane*.

| <i>r-1, c-2, c-3, c-4, t-5-1ax, 2eq, 3ax, 4eq, 5eq</i> |           |           |           |
|--------------------------------------------------------|-----------|-----------|-----------|
| <i>E</i> (MP2/cc-pVTZ) = -2530.9115752 a.u.            |           |           |           |
| atom                                                   | X         | Y         | Z         |
| C                                                      | 1.109311  | 1.353935  | -0.455978 |
| C                                                      | 1.277574  | -0.073396 | -0.987477 |
| C                                                      | 0.311592  | -1.112191 | -0.400633 |
| C                                                      | -1.131361 | -0.604698 | -0.572289 |
| C                                                      | -1.317514 | 0.764591  | 0.083525  |
| C                                                      | -0.359690 | 1.768273  | -0.564289 |
| H                                                      | 0.419378  | -2.034855 | -0.979018 |
| H                                                      | 1.711091  | 2.012523  | -1.089085 |
| H                                                      | -0.621955 | 1.857025  | -1.626667 |
| H                                                      | -0.493461 | 2.752338  | -0.107103 |
| Cl                                                     | 1.709312  | 1.609121  | 1.202426  |
| Cl                                                     | 0.666943  | -1.545545 | 1.284700  |
| Cl                                                     | -2.981012 | 1.364043  | -0.143148 |
| H                                                      | -1.143539 | 0.687186  | 1.160334  |
| H                                                      | -1.311611 | -0.491137 | -1.649145 |
| Cl                                                     | -2.292330 | -1.820717 | -0.003821 |
| Cl                                                     | 2.961111  | -0.627845 | -0.944573 |
| H                                                      | 1.012220  | -0.006130 | -2.051403 |

**Table S81** Optimized cartesian coordinates and total energies of *r-1, c-2, t-3, t-4, t-5-1ax, 2eq,*

3eq, 4ax, 5eq-pentachlorocyclohexane.

| <i>r-1, c-2, t-3, t-4, t-5-1ax, 2eq, 3eq, 4ax, 5eq</i> |           |           |           |
|--------------------------------------------------------|-----------|-----------|-----------|
| <i>E</i> (MP2/cc-pVTZ) = -2530.9189554 a.u.            |           |           |           |
| atom                                                   | X         | Y         | Z         |
| C                                                      | -0.574519 | 1.418982  | 0.742327  |
| C                                                      | -1.181768 | 0.016132  | 0.591633  |
| C                                                      | -0.574614 | -0.712270 | -0.611757 |
| C                                                      | 0.956023  | -0.798587 | -0.475094 |
| C                                                      | 1.528055  | 0.618443  | -0.368843 |
| C                                                      | 0.952907  | 1.360155  | 0.833163  |
| H                                                      | -0.983735 | 1.876355  | 1.647677  |
| H                                                      | 1.242333  | 0.845698  | 1.755461  |
| H                                                      | 1.349026  | 2.378280  | 0.868660  |
| Cl                                                     | -1.052055 | 2.493228  | -0.610896 |
| H                                                      | -0.797161 | -0.142273 | -1.520378 |
| Cl                                                     | -1.265705 | -2.330396 | -0.848227 |
| Cl                                                     | 3.306209  | 0.607163  | -0.323466 |
| H                                                      | 1.250522  | 1.144057  | -1.288295 |
| H                                                      | 1.362116  | -1.296951 | -1.360327 |
| Cl                                                     | 1.428065  | -1.794435 | 0.927364  |
| Cl                                                     | -2.953101 | 0.102203  | 0.509842  |
| H                                                      | -0.937619 | -0.544270 | 1.500149  |

**Table S82** Optimized cartesian coordinates and total energies of *r-1, c-2, t-3, c-4, c-5-1ax, 2eq, 3eq, 4eq, 5ax-pentachlorocyclohexane*.

| <i>r-1, c-2, t-3, c-4, c-5-1ax, 2eq, 3eq, 4eq, 5ax</i> |           |           |           |
|--------------------------------------------------------|-----------|-----------|-----------|
| <i>E</i> (MP2/cc-pVTZ) = -2530.9098770 a.u.            |           |           |           |
| atom                                                   | X         | Y         | Z         |
| C                                                      | 1.291993  | -1.069382 | 0.796647  |
| C                                                      | 1.244635  | 0.450655  | 0.601930  |
| C                                                      | -0.000001 | 0.912592  | -0.171902 |
| C                                                      | -1.244636 | 0.450654  | 0.601931  |
| C                                                      | -1.291991 | -1.069383 | 0.796647  |
| C                                                      | 0.000001  | -1.562448 | 1.454229  |
| H                                                      | 2.128372  | -1.292051 | 1.465849  |
| H                                                      | 0.000001  | -1.185930 | 2.486765  |
| H                                                      | 0.000002  | -2.655082 | 1.500086  |
| Cl                                                     | 1.656826  | -1.930523 | -0.721380 |
| H                                                      | -1.189979 | 0.896450  | 1.603901  |
| Cl                                                     | -2.757666 | 1.040523  | -0.116025 |
| Cl                                                     | -1.656824 | -1.930525 | -0.721380 |
| H                                                      | -2.128371 | -1.292054 | 1.465849  |
| H                                                      | -0.000001 | 0.506945  | -1.188036 |
| Cl                                                     | -0.000002 | 2.688773  | -0.290788 |
| H                                                      | 1.189979  | 0.896451  | 1.603901  |
| Cl                                                     | 2.757665  | 1.040525  | -0.116027 |

**Table S83** Optimized cartesian coordinates and total energies of *r-1, c-2, t-3, c-4, t-5-1ax, 2eq,*

3eq, 4eq, 5eq-pentachlorocyclohexane.

| <i>r-1, c-2, t-3, c-4, t-5-1ax, 2eq, 3eq, 4eq, 5eq</i> |           |           |           |
|--------------------------------------------------------|-----------|-----------|-----------|
| <i>E</i> (MP2/cc-pVTZ) = -2530.9179527 a.u.            |           |           |           |
| atom                                                   | X         | Y         | Z         |
| C                                                      | -0.895752 | -1.573546 | -0.453133 |
| C                                                      | -1.359058 | -0.132253 | -0.665593 |
| C                                                      | -0.513170 | 0.863955  | 0.135040  |
| C                                                      | 0.989421  | 0.687889  | -0.157117 |
| C                                                      | 1.455212  | -0.767352 | -0.040620 |
| C                                                      | 0.569017  | -1.704401 | -0.857242 |
| H                                                      | -1.515739 | -2.235212 | -1.065072 |
| H                                                      | 0.663562  | -1.457986 | -1.922340 |
| H                                                      | 0.903277  | -2.736584 | -0.719817 |
| Cl                                                     | -1.116650 | -2.098698 | 1.241812  |
| H                                                      | 1.192668  | 1.043683  | -1.174176 |
| Cl                                                     | 1.929942  | 1.714000  | 0.954892  |
| H                                                      | -0.702964 | 0.733804  | 1.204470  |
| Cl                                                     | -0.989402 | 2.527996  | -0.289751 |
| Cl                                                     | 3.135621  | -0.921543 | -0.620858 |
| H                                                      | 1.456315  | -1.062975 | 1.011622  |
| H                                                      | -1.236773 | 0.087640  | -1.733532 |
| Cl                                                     | -3.090944 | 0.036002  | -0.307811 |

**Table S84** Optimized cartesian coordinates and total energies of *r-1, c-2, t-3, c-4, c-5-1eq, 2ax, 3ax, 4ax, 5eq*-pentachlorocyclohexane.

| <i>r-1, c-2, t-3, c-4, c-5-1eq, 2ax, 3ax, 4ax, 5eq</i> |           |           |           |
|--------------------------------------------------------|-----------|-----------|-----------|
| <i>E</i> (MP2/cc-pVTZ) = -2530.9155210 a.u.            |           |           |           |
| atom                                                   | X         | Y         | Z         |
| C                                                      | 0.722174  | 0.601920  | 1.233904  |
| C                                                      | -0.695235 | 0.026386  | 1.306730  |
| C                                                      | -1.463857 | 0.310145  | 0.000000  |
| C                                                      | -0.695235 | 0.026386  | -1.306730 |
| C                                                      | 0.722174  | 0.601920  | -1.233904 |
| C                                                      | 1.478667  | 0.115928  | 0.000000  |
| H                                                      | -2.395064 | -0.261827 | 0.000000  |
| H                                                      | -1.238542 | 0.503050  | 2.126916  |
| H                                                      | -1.238542 | 0.503050  | -2.126916 |
| H                                                      | 1.568581  | -0.974133 | 0.000000  |
| H                                                      | 2.482873  | 0.548621  | 0.000000  |
| Cl                                                     | -0.695235 | -1.717634 | 1.668500  |
| Cl                                                     | -0.695235 | -1.717634 | -1.668500 |
| Cl                                                     | -1.933711 | 2.045045  | 0.000000  |
| Cl                                                     | 1.638017  | 0.289354  | -2.725742 |
| H                                                      | 0.613544  | 1.690429  | -1.174530 |
| Cl                                                     | 1.638017  | 0.289354  | 2.725742  |
| H                                                      | 0.613544  | 1.690429  | 1.174530  |

**Table S85** Optimized cartesian coordinates and total energies of *r-1, c-2, t-3, t-4, c-5-1eq, 2ax,*

3ax, 4eq, 5eq-pentachlorocyclohexane.

| <i>r-1, c-2, t-3, t-4, c-5-1eq, 2ax, 3ax, 4eq, 5eq</i> |           |           |           |
|--------------------------------------------------------|-----------|-----------|-----------|
| <i>E</i> (MP2/cc-pVTZ) = -2530.9207306 a.u.            |           |           |           |
| atom                                                   | X         | Y         | Z         |
| C                                                      | -1.489229 | 0.236150  | -0.702794 |
| C                                                      | -1.246758 | -0.913885 | 0.276658  |
| C                                                      | 0.227518  | -1.344069 | 0.230106  |
| C                                                      | 1.169785  | -0.160503 | 0.493171  |
| C                                                      | 0.907962  | 0.990033  | -0.479440 |
| C                                                      | -0.564444 | 1.417787  | -0.428069 |
| H                                                      | 0.403014  | -2.111551 | 0.988863  |
| H                                                      | -1.878874 | -1.767552 | 0.016974  |
| H                                                      | -0.788667 | 1.846135  | 0.553527  |
| H                                                      | -0.733245 | 2.194416  | -1.179436 |
| Cl                                                     | -1.653944 | -0.465646 | 1.956289  |
| Cl                                                     | 0.541426  | -2.113190 | -1.353421 |
| Cl                                                     | 1.920832  | 2.401240  | -0.078155 |
| H                                                      | 1.186256  | 0.679295  | -1.491298 |
| H                                                      | 0.973230  | 0.193473  | 1.510054  |
| Cl                                                     | 2.861006  | -0.704410 | 0.465167  |
| Cl                                                     | -3.192599 | 0.750868  | -0.697633 |
| H                                                      | -1.294949 | -0.157942 | -1.704684 |

**Table S86** Optimized cartesian coordinates and total energies of *r-1, c-2, c-3, c-4, c-5-1eq, 2ax, 3eq, 4ax, 5eq*-pentachlorocyclohexane.

| <i>r-1, c-2, c-3, c-4, c-5-1eq, 2ax, 3eq, 4ax, 5eq</i> |           |           |           |
|--------------------------------------------------------|-----------|-----------|-----------|
| <i>E</i> (MP2/cc-pVTZ) = -2530.9102710 a.u.            |           |           |           |
| atom                                                   | X         | Y         | Z         |
| C                                                      | 1.103648  | -0.544726 | 1.235427  |
| C                                                      | 0.101418  | 0.616266  | 1.303970  |
| C                                                      | 0.225243  | 1.423757  | 0.000000  |
| C                                                      | 0.101418  | 0.616266  | -1.303970 |
| C                                                      | 1.103648  | -0.544726 | -1.235427 |
| C                                                      | 0.894781  | -1.417759 | 0.000000  |
| H                                                      | 0.379307  | 1.277526  | 2.130440  |
| H                                                      | -0.106143 | -1.858673 | 0.000000  |
| H                                                      | 1.632408  | -2.224776 | 0.000000  |
| Cl                                                     | -1.544398 | 0.055994  | 1.655374  |
| H                                                      | 1.253697  | 1.809792  | 0.000000  |
| Cl                                                     | -0.819819 | 2.856243  | 0.000000  |
| Cl                                                     | 1.103648  | -1.513382 | -2.726062 |
| H                                                      | 2.101458  | -0.090397 | -1.179682 |
| H                                                      | 0.379307  | 1.277526  | -2.130440 |
| Cl                                                     | -1.544398 | 0.055994  | -1.655374 |
| Cl                                                     | 1.103648  | -1.513382 | 2.726062  |
| H                                                      | 2.101458  | -0.090397 | 1.179682  |

**Table S87** Optimized cartesian coordinates and total energies of *r-1, c-2, c-3, t-4, c-5-1eq, 2ax,*

3eq, 4eq, 5eq-pentachlorocyclohexane.

| <i>r-1, c-2, c-3, t-4, c-5-1eq, 2ax, 3eq, 4eq, 5eq</i> |           |           |           |
|--------------------------------------------------------|-----------|-----------|-----------|
| <i>E(MP2/cc-pVTZ) = -2530.9172843 a.u.</i>             |           |           |           |
| atom                                                   | X         | Y         | Z         |
| C                                                      | 1.556173  | -0.513980 | -0.767849 |
| C                                                      | 1.171333  | 0.877516  | -0.261454 |
| C                                                      | -0.312916 | 1.106908  | -0.575459 |
| C                                                      | -1.213093 | 0.055027  | 0.087780  |
| C                                                      | -0.754545 | -1.357493 | -0.304671 |
| C                                                      | 0.739665  | -1.595985 | -0.072343 |
| H                                                      | 1.764323  | 1.640093  | -0.775147 |
| H                                                      | 0.961931  | -1.601504 | 0.997879  |
| H                                                      | 1.003372  | -2.576825 | -0.477625 |
| Cl                                                     | 1.502753  | 1.051504  | 1.478826  |
| H                                                      | -1.184976 | 0.172552  | 1.174931  |
| Cl                                                     | -2.899498 | 0.294621  | -0.433382 |
| H                                                      | -0.432528 | 1.027182  | -1.663402 |
| Cl                                                     | -0.790050 | 2.761764  | -0.140402 |
| Cl                                                     | -1.677690 | -2.587487 | 0.597944  |
| H                                                      | -0.991653 | -1.506134 | -1.365069 |
| Cl                                                     | 3.300587  | -0.818003 | -0.601974 |
| H                                                      | 1.346077  | -0.528125 | -1.844813 |

**Table S88** Optimized cartesian coordinates and total energies of *r-1, t-2, t-3, t-4, c-5-1eq, 2eq, 3ax, 4eq, 5eq*-pentachlorocyclohexane.

| <i>r-1, t-2, t-3, t-4, c-5-1eq, 2eq, 3ax, 4eq, 5eq</i> |           |           |           |
|--------------------------------------------------------|-----------|-----------|-----------|
| <i>E(MP2/cc-pVTZ) = -2530.9179808 a.u.</i>             |           |           |           |
| atom                                                   | X         | Y         | Z         |
| C                                                      | 0.849334  | 0.367691  | 1.282717  |
| C                                                      | -0.331352 | -0.601875 | 1.254797  |
| C                                                      | -1.186275 | -0.377006 | 0.000000  |
| C                                                      | -0.331352 | -0.601875 | -1.254797 |
| C                                                      | 0.849334  | 0.367691  | -1.282717 |
| C                                                      | 1.674377  | 0.218954  | 0.000000  |
| H                                                      | -2.013890 | -1.092406 | 0.000000  |
| H                                                      | 2.146058  | -0.770673 | 0.000000  |
| H                                                      | 2.477603  | 0.961662  | 0.000000  |
| Cl                                                     | -1.917128 | 1.249647  | 0.000000  |
| Cl                                                     | 1.915302  | 0.037550  | -2.673131 |
| H                                                      | 0.478492  | 1.389173  | -1.402205 |
| H                                                      | 0.061318  | -1.625371 | -1.207462 |
| Cl                                                     | -1.334202 | -0.511423 | -2.717220 |
| Cl                                                     | -1.334202 | -0.511423 | 2.717220  |
| H                                                      | 0.061318  | -1.625371 | 1.207462  |
| Cl                                                     | 1.915302  | 0.037550  | 2.673131  |
| H                                                      | 0.478492  | 1.389173  | 1.402205  |

**Table S89** Optimized cartesian coordinates and total energies of *r-1, t-2, c-3, t-4, c-5-1eq, 2eq,*

3eq, 4eq, 5eq-pentachlorocyclohexane.

| <i>r-1, t-2, c-3, t-4, c-5-1eq, 2eq, 3eq, 4eq, 5eq</i> |           |           |           |
|--------------------------------------------------------|-----------|-----------|-----------|
| <i>E(MP2/cc-pVTZ) = -2530.9165407 a.u.</i>             |           |           |           |
| atom                                                   | X         | Y         | Z         |
| C                                                      | -1.254130 | -1.096806 | 0.336981  |
| C                                                      | -1.285661 | 0.336024  | -0.196009 |
| C                                                      | -0.000001 | 1.097647  | 0.168137  |
| C                                                      | 1.285660  | 0.336026  | -0.196009 |
| C                                                      | 1.254132  | -1.096804 | 0.336981  |
| C                                                      | 0.000001  | -1.821946 | -0.138288 |
| H                                                      | 0.000001  | -1.882050 | -1.232956 |
| H                                                      | 0.000002  | -2.844192 | 0.250421  |
| H                                                      | 1.399620  | 0.310530  | -1.285817 |
| Cl                                                     | 2.689898  | 1.208668  | 0.465970  |
| H                                                      | -0.000001 | 1.298362  | 1.245788  |
| Cl                                                     | -0.000003 | 2.675591  | -0.660153 |
| Cl                                                     | 2.688138  | -2.004549 | -0.207283 |
| H                                                      | 1.289614  | -1.071506 | 1.432413  |
| H                                                      | -1.399620 | 0.310528  | -1.285817 |
| Cl                                                     | -2.689899 | 1.208666  | 0.465970  |
| Cl                                                     | -2.688136 | -2.004552 | -0.207282 |
| H                                                      | -1.289612 | -1.071507 | 1.432413  |

**Table S90** Optimized cartesian coordinates and total energies of *r-1, t-2, c-3, t-4, c-5, t-6-1ax, 2ax, 3ax, 4ax, 5ax, 6ax*-hexachlorocyclohexane.

| <i>r-1, t-2, c-3, t-4, c-5, t-6-1ax, 2ax, 3ax, 4ax, 5ax, 6ax</i> |           |           |           |
|------------------------------------------------------------------|-----------|-----------|-----------|
| <i>E(MP2/cc-pVTZ) = -2990.0132979 a.u.</i>                       |           |           |           |
| atom                                                             | X         | Y         | Z         |
| C                                                                | -0.162776 | 0.376446  | -1.455726 |
| C                                                                | 0.162771  | 1.448921  | -0.401852 |
| C                                                                | -0.162773 | 1.072475  | 1.053874  |
| C                                                                | 0.162776  | -0.376446 | 1.455726  |
| C                                                                | -0.162770 | -1.448921 | 0.401852  |
| C                                                                | 0.162773  | -1.072475 | -1.053874 |
| H                                                                | 0.406337  | 1.736989  | 1.706860  |
| H                                                                | -0.406345 | 2.346678  | -0.650840 |
| H                                                                | 0.406330  | 0.609696  | -2.357706 |
| H                                                                | -0.406330 | -0.609696 | 2.357706  |
| H                                                                | 0.406346  | -2.346678 | 0.650840  |
| H                                                                | -0.406338 | -1.736988 | -1.706859 |
| Cl                                                               | -1.883643 | 0.500513  | -1.935492 |
| Cl                                                               | 1.883633  | 1.926461  | -0.534294 |
| Cl                                                               | -1.883639 | 1.425940  | 1.401205  |
| Cl                                                               | 1.883644  | -0.500512 | 1.935492  |
| Cl                                                               | -1.883633 | -1.926461 | 0.534295  |
| Cl                                                               | 1.883638  | -1.425940 | -1.401206 |

**Table S91** Optimized cartesian coordinates and total energies of *r-1, t-2, c-3, t-4, c-5, c-6-1ax,*

2ax, 3ax, 4ax, 5ax, 6eq-hexachlorocyclohexane.

| <i>r-1, t-2, c-3, t-4, c-5, c-6-1ax, 2ax, 3ax, 4ax, 5ax, 6eq</i> |           |           |           |
|------------------------------------------------------------------|-----------|-----------|-----------|
| <i>E(MP2/cc-pVTZ) = -2990.0187913 a.u.</i>                       |           |           |           |
| atom                                                             | X         | Y         | Z         |
| C                                                                | -0.509453 | -0.338518 | -1.297152 |
| C                                                                | 0.944901  | 0.166361  | -1.304962 |
| C                                                                | 1.425531  | 0.830155  | -0.000020 |
| C                                                                | 0.944912  | 0.166405  | 1.304949  |
| C                                                                | -0.509442 | -0.338475 | 1.297168  |
| C                                                                | -0.806234 | -1.092267 | 0.000022  |
| H                                                                | 2.517306  | 0.817983  | -0.000024 |
| H                                                                | 1.063799  | 0.883471  | -2.119508 |
| H                                                                | -0.614085 | -1.048843 | -2.120485 |
| H                                                                | 1.063817  | 0.883542  | 2.119470  |
| H                                                                | -0.614068 | -1.048772 | 2.120526  |
| Cl                                                               | -1.640734 | 0.984098  | -1.667212 |
| Cl                                                               | 2.012224  | -1.217540 | -1.712224 |
| Cl                                                               | 0.969885  | 2.560052  | -0.000047 |
| Cl                                                               | 2.012239  | -1.217483 | 1.712248  |
| Cl                                                               | -1.640721 | 0.984154  | 1.667192  |
| Cl                                                               | -2.433263 | -1.793817 | 0.000040  |
| H                                                                | -0.111767 | -1.940203 | 0.000033  |

**Table S92** Optimized cartesian coordinates and total energies of *r-1, t-2, c-3, t-4, c-5, c-6-1ax, 2ax, 3ax, 4ax, 5ax, 6eq*-hexachlorocyclohexane.

| <i>r-1, t-2, c-3, t-4, c-5, c-6-1ax, 2ax, 3ax, 4ax, 5ax, 6eq</i> |           |           |           |
|------------------------------------------------------------------|-----------|-----------|-----------|
| <i>E(MP2/cc-pVTZ) = -2990.0253165 a.u.</i>                       |           |           |           |
| atom                                                             | X         | Y         | Z         |
| C                                                                | 0.237408  | -1.338131 | 0.671125  |
| C                                                                | 1.551464  | -0.548984 | 0.540842  |
| C                                                                | 1.551481  | 0.548922  | -0.540871 |
| C                                                                | 0.237463  | 1.338134  | -0.671119 |
| C                                                                | -0.988372 | 0.415067  | -0.642812 |
| C                                                                | -0.988389 | -0.415014 | 0.642808  |
| H                                                                | 2.361181  | 1.248606  | -0.322353 |
| H                                                                | 2.361129  | -1.248706 | 0.322318  |
| H                                                                | 0.252425  | -1.870198 | 1.625418  |
| H                                                                | 0.252493  | 1.870232  | -1.625393 |
| Cl                                                               | 0.151304  | -2.599583 | -0.589816 |
| Cl                                                               | 1.936726  | 0.159020  | 2.140484  |
| Cl                                                               | 1.936691  | -0.159081 | -2.140528 |
| Cl                                                               | 0.151437  | 2.599537  | 0.589876  |
| Cl                                                               | -2.470298 | -1.363874 | 0.863896  |
| H                                                                | -0.919517 | 0.259302  | 1.502197  |
| H                                                                | -0.919525 | -0.259249 | -1.502202 |
| Cl                                                               | -2.470243 | 1.363985  | -0.863902 |

**Table S93** Optimized cartesian coordinates and total energies of *r-1, t-2, c-3, c-4, c-5, c-6-1ax,*

2ax, 3ax, 4eq, 5ax, 6eq-hexachlorocyclohexane.

| <i>r-1, t-2, c-3, c-4, c-5, c-6-1ax, 2ax, 3ax, 4eq, 5ax, 6eq</i> |           |           |           |
|------------------------------------------------------------------|-----------|-----------|-----------|
| <i>E(MP2/cc-pVTZ) = -2990.0188975 a.u.</i>                       |           |           |           |
| atom                                                             | X         | Y         | Z         |
| C                                                                | 0.903880  | -0.229911 | 1.304129  |
| C                                                                | 1.721560  | -0.280408 | 0.000000  |
| C                                                                | 0.903880  | -0.229911 | -1.304129 |
| C                                                                | -0.148129 | 0.882647  | -1.239088 |
| C                                                                | -1.054710 | 0.874167  | 0.000000  |
| C                                                                | -0.148129 | 0.882647  | 1.239088  |
| H                                                                | 1.594454  | 0.020058  | -2.113820 |
| H                                                                | 2.341864  | -1.179813 | 0.000000  |
| H                                                                | 1.594454  | 0.020058  | 2.113820  |
| Cl                                                               | 0.260231  | -1.836088 | 1.709553  |
| Cl                                                               | 2.854588  | 1.117043  | 0.000000  |
| Cl                                                               | 0.260231  | -1.836088 | -1.709553 |
| H                                                                | 0.428588  | 1.812357  | -1.163906 |
| Cl                                                               | -1.069623 | 1.015844  | -2.746050 |
| Cl                                                               | -1.069623 | 1.015844  | 2.746050  |
| H                                                                | 0.428588  | 1.812357  | 1.163906  |
| H                                                                | -1.609007 | 1.817913  | 0.000000  |
| Cl                                                               | -2.285747 | -0.399986 | 0.000000  |

**Table S94** Optimized cartesian coordinates and total energies of *r-1, t-2, c-3, c-4, t-5, c-6-1ax, 2ax, 3ax, 4eq, 5eq, 6eq*-hexachlorocyclohexane.

| <i>r-1, t-2, c-3, c-4, t-5, c-6-1ax, 2ax, 3ax, 4eq, 5eq, 6eq</i> |           |           |           |
|------------------------------------------------------------------|-----------|-----------|-----------|
| <i>E(MP2/cc-pVTZ) = -2990.0263958 a.u.</i>                       |           |           |           |
| atom                                                             | X         | Y         | Z         |
| C                                                                | -1.295839 | -1.028913 | 0.135263  |
| C                                                                | 0.000000  | -1.725438 | 0.579134  |
| C                                                                | 1.295839  | -1.028913 | 0.135263  |
| C                                                                | 1.244164  | 0.477505  | 0.417794  |
| C                                                                | 0.000000  | 1.150088  | -0.181435 |
| C                                                                | -1.244164 | 0.477505  | 0.417794  |
| H                                                                | 2.123364  | -1.455131 | 0.708391  |
| H                                                                | 0.000000  | -2.756708 | 0.217649  |
| H                                                                | -2.123364 | -1.455131 | 0.708391  |
| Cl                                                               | -1.651217 | -1.386655 | -1.573163 |
| Cl                                                               | 0.000000  | -1.810671 | 2.372872  |
| Cl                                                               | 1.651217  | -1.386655 | -1.573163 |
| H                                                                | 0.000000  | 1.071870  | -1.272823 |
| Cl                                                               | 0.000000  | 2.878316  | 0.240742  |
| H                                                                | 1.196124  | 0.601560  | 1.505438  |
| Cl                                                               | 2.757321  | 1.248744  | -0.098214 |
| Cl                                                               | -2.757321 | 1.248744  | -0.098214 |
| H                                                                | -1.196124 | 0.601560  | 1.505438  |

**Table S95** Optimized cartesian coordinates and total energies of *r-1, t-2, t-3, t-4, c-5, c-6-1ax,*

2ax, 3eq, 4ax, 5ax, 6eq-hexachlorocyclohexane.

| <i>r-1, t-2, t-3, t-4, c-5, c-6-1ax, 2ax, 3eq, 4ax, 5ax, 6eq</i> |           |           |           |
|------------------------------------------------------------------|-----------|-----------|-----------|
| <i>E(MP2/cc-pVTZ) = -2990.0247097 a.u.</i>                       |           |           |           |
| atom                                                             | X         | Y         | Z         |
| C                                                                | 0.000003  | 0.769954  | 1.300141  |
| C                                                                | 0.000003  | -0.769957 | 1.300137  |
| C                                                                | -0.603027 | -1.310158 | 0.000000  |
| C                                                                | 0.000003  | -0.769957 | -1.300137 |
| C                                                                | 0.000003  | 0.769954  | -1.300141 |
| C                                                                | 0.603020  | 1.310164  | 0.000000  |
| H                                                                | -0.624829 | -1.113830 | 2.128076  |
| H                                                                | 0.624846  | 1.113821  | 2.128074  |
| Cl                                                               | -1.646285 | 1.354030  | 1.657713  |
| Cl                                                               | 1.646297  | -1.354033 | 1.657678  |
| H                                                                | -1.639265 | -0.951103 | 0.000000  |
| Cl                                                               | -0.693202 | -3.080278 | 0.000000  |
| H                                                                | -0.624829 | -1.113830 | -2.128076 |
| Cl                                                               | 1.646297  | -1.354033 | -1.657678 |
| Cl                                                               | 0.693175  | 3.080284  | 0.000000  |
| H                                                                | 1.639262  | 0.951122  | 0.000000  |
| H                                                                | 0.624846  | 1.113821  | -2.128074 |
| Cl                                                               | -1.646285 | 1.354030  | -1.657713 |

**Table S96** Optimized cartesian coordinates and total energies of *r-1, t-2, t-3, t-4, t-5, c-6-1ax, 2ax, 3eq, 4ax, 5eq, 6eq*-hexachlorocyclohexane.

| <i>r-1, t-2, t-3, t-4, t-5, c-6-1ax, 2ax, 3eq, 4ax, 5eq, 6eq</i> |           |           |           |
|------------------------------------------------------------------|-----------|-----------|-----------|
| <i>E(MP2/cc-pVTZ) = -2990.0267453 a.u.</i>                       |           |           |           |
| atom                                                             | X         | Y         | Z         |
| C                                                                | -0.512711 | -1.500514 | 0.295095  |
| C                                                                | 1.006939  | -1.299199 | 0.193949  |
| C                                                                | 1.330075  | -0.217015 | -0.842423 |
| C                                                                | 0.565160  | 1.103539  | -0.678082 |
| C                                                                | -0.945117 | 0.807270  | -0.613651 |
| C                                                                | -1.251675 | -0.173869 | 0.521063  |
| H                                                                | 1.458705  | -2.235061 | -0.144988 |
| H                                                                | -0.728381 | -2.174114 | 1.128214  |
| Cl                                                               | -1.074857 | -2.334205 | -1.186110 |
| Cl                                                               | 1.659481  | -1.003083 | 1.823416  |
| H                                                                | 0.990067  | -0.630882 | -1.799103 |
| Cl                                                               | 3.075094  | 0.035765  | -1.019046 |
| H                                                                | -1.233572 | 0.345952  | -1.564088 |
| Cl                                                               | -1.872114 | 2.314210  | -0.495228 |
| H                                                                | 0.754337  | 1.711527  | -1.567935 |
| Cl                                                               | 1.113309  | 2.077337  | 0.704207  |
| Cl                                                               | -2.989279 | -0.477534 | 0.715488  |
| H                                                                | -0.894956 | 0.248989  | 1.465829  |

**Table S97** Optimized cartesian coordinates and total energies of *r-1, t-2, t-3, c-4, t-5, c-6-1ax,*

2ax, 3eq, 4eq, 5eq, 6eq-hexachlorocyclohexane.

| <i>r-1, t-2, t-3, c-4, t-5, c-6-1ax, 2ax, 3eq, 4eq, 5eq, 6eq</i> |           |           |           |
|------------------------------------------------------------------|-----------|-----------|-----------|
| <i>E(MP2/cc-pVTZ) = -2990.0323191 a.u.</i>                       |           |           |           |
| atom                                                             | X         | Y         | Z         |
| C                                                                | 0.755338  | -1.544781 | 0.127317  |
| C                                                                | -0.755338 | -1.544781 | -0.127318 |
| C                                                                | -1.403640 | -0.289206 | 0.459828  |
| C                                                                | -0.766620 | 0.995357  | -0.080351 |
| C                                                                | 0.766620  | 0.995357  | 0.080351  |
| C                                                                | 1.403640  | -0.289205 | -0.459828 |
| H                                                                | -1.201833 | -2.427676 | 0.338400  |
| H                                                                | 1.201833  | -2.427676 | -0.338401 |
| Cl                                                               | 1.036627  | -1.690433 | 1.885171  |
| Cl                                                               | -1.036626 | -1.690432 | -1.885171 |
| H                                                                | -1.022098 | 1.116871  | -1.137632 |
| Cl                                                               | -1.437373 | 2.397956  | 0.789022  |
| H                                                                | -1.261175 | -0.322920 | 1.543838  |
| Cl                                                               | -3.158250 | -0.315436 | 0.182989  |
| Cl                                                               | 3.158250  | -0.315435 | -0.182989 |
| H                                                                | 1.261175  | -0.322919 | -1.543839 |
| H                                                                | 1.022098  | 1.116871  | 1.137632  |
| Cl                                                               | 1.437373  | 2.397957  | -0.789022 |

**Table S98** Optimized cartesian coordinates and total energies of *r-1, c-2, c-3, c-4, t-5, c-6-1ax, 2eq, 3ax, 4eq, 5eq, 6eq*-hexachlorocyclohexane.

| <i>r-1, c-2, c-3, c-4, t-5, c-6-1ax, 2eq, 3ax, 4eq, 5eq, 6eq</i> |           |           |           |
|------------------------------------------------------------------|-----------|-----------|-----------|
| <i>E(MP2/cc-pVTZ) = -2990.0211220 a.u.</i>                       |           |           |           |
| atom                                                             | X         | Y         | Z         |
| C                                                                | 0.251690  | -0.883153 | 1.293991  |
| C                                                                | 0.708539  | -1.567926 | 0.000000  |
| C                                                                | 0.251690  | -0.883153 | -1.293991 |
| C                                                                | 0.684609  | 0.590573  | -1.245800 |
| C                                                                | 0.162851  | 1.323599  | 0.000000  |
| C                                                                | 0.684609  | 0.590573  | 1.245800  |
| H                                                                | 0.776640  | -1.359704 | 2.127390  |
| Cl                                                               | -1.479107 | -1.063556 | 1.639361  |
| H                                                                | 1.803830  | -1.483294 | 0.000000  |
| Cl                                                               | 0.363122  | -3.305632 | 0.000000  |
| H                                                                | 1.781535  | 0.603132  | -1.199857 |
| Cl                                                               | 0.251690  | 1.413151  | -2.757127 |
| H                                                                | 0.776640  | -1.359704 | -2.127390 |
| Cl                                                               | -1.479107 | -1.063556 | -1.639361 |
| Cl                                                               | 0.251690  | 1.413151  | 2.757127  |
| H                                                                | 1.781535  | 0.603132  | 1.199857  |
| H                                                                | -0.930665 | 1.361465  | 0.000000  |
| Cl                                                               | 0.770920  | 2.995379  | 0.000000  |

**Table S99** Optimized cartesian coordinates and total energies of *r-1, c-2, t-3, t-4, t-5, c-6-1ax,*

2eq, 3eq, 4ax, 5eq, 6eq-hexachlorocyclohexane.

| <i>r-1, c-2, t-3, t-4, t-5, c-6-1ax, 2eq, 3eq, 4ax, 5eq, 6eq</i> |           |           |           |
|------------------------------------------------------------------|-----------|-----------|-----------|
| <i>E(MP2/cc-pVTZ) = -2990.0299833 a.u.</i>                       |           |           |           |
| atom                                                             | X         | Y         | Z         |
| C                                                                | 0.000000  | -1.388184 | -0.488080 |
| C                                                                | -1.261967 | -0.513692 | -0.567432 |
| C                                                                | -1.261967 | 0.513692  | 0.567432  |
| C                                                                | 0.000000  | 1.388184  | 0.488080  |
| C                                                                | 1.261967  | 0.513692  | 0.567432  |
| C                                                                | 1.261967  | -0.513692 | -0.567432 |
| H                                                                | 0.000000  | -2.084713 | -1.331508 |
| Cl                                                               | 0.000000  | -2.387191 | 0.991246  |
| H                                                                | -1.244232 | -0.015601 | 1.525874  |
| Cl                                                               | -2.718510 | 1.526156  | 0.576480  |
| H                                                                | 0.000000  | 2.084713  | 1.331508  |
| Cl                                                               | 0.000000  | 2.387191  | -0.991246 |
| H                                                                | -1.244232 | 0.015601  | -1.525874 |
| Cl                                                               | -2.718510 | -1.526156 | -0.576480 |
| Cl                                                               | 2.718510  | -1.526156 | -0.576480 |
| H                                                                | 1.244232  | 0.015601  | -1.525874 |
| H                                                                | 1.244232  | -0.015601 | 1.525874  |
| Cl                                                               | 2.718510  | 1.526156  | 0.576480  |

**Table S100** Optimized cartesian coordinates and total energies of *r-1, c-2, t-3, c-4, t-5, c-6-1ax, 2eq, 3eq, 4eq, 5eq, 6eq*-hexachlorocyclohexane.

| <i>r-1, c-2, t-3, c-4, t-5, c-6-1ax, 2eq, 3eq, 4eq, 5eq, 6eq</i> |           |           |           |
|------------------------------------------------------------------|-----------|-----------|-----------|
| <i>E(MP2/cc-pVTZ) = -2990.0290398 a.u.</i>                       |           |           |           |
| atom                                                             | X         | Y         | Z         |
| C                                                                | -0.307335 | -1.576533 | 0.000000  |
| C                                                                | -0.671513 | -0.763045 | 1.243170  |
| C                                                                | 0.117705  | 0.546541  | 1.297656  |
| C                                                                | -0.062149 | 1.355128  | 0.000000  |
| C                                                                | 0.117705  | 0.546541  | -1.297656 |
| C                                                                | -0.671513 | -0.763045 | -1.243170 |
| H                                                                | -0.881023 | -2.507951 | 0.000000  |
| Cl                                                               | 1.416046  | -2.026837 | 0.000000  |
| H                                                                | 1.176364  | 0.333225  | 1.466970  |
| Cl                                                               | -0.448479 | 1.536142  | 2.665962  |
| H                                                                | -1.741801 | -0.528797 | 1.183222  |
| Cl                                                               | -0.448479 | -1.735056 | 2.711570  |
| H                                                                | 1.176364  | 0.333225  | -1.466970 |
| Cl                                                               | -0.448479 | 1.536142  | -2.665962 |
| H                                                                | -1.071608 | 1.782746  | 0.000000  |
| Cl                                                               | 1.080582  | 2.721302  | 0.000000  |
| Cl                                                               | -0.448479 | -1.735056 | -2.711570 |
| H                                                                | -1.741801 | -0.528797 | -1.183222 |

**Table S101** Optimized cartesian coordinates and total energies of *r-1, c-2, c-3, c-4, c-5, c-6-*

1eq, 2ax, 3eq, 4ax, 5eq, 6ax-hexachlorocyclohexane.

| <i>r-1, c-2, c-3, c-4, c-5, c-6-1eq, 2ax, 3eq, 4ax, 5eq, 6ax</i> |           |           |           |
|------------------------------------------------------------------|-----------|-----------|-----------|
| <i>E(MP2/cc-pVTZ) = -2990.0125342 a.u.</i>                       |           |           |           |
| atom                                                             | X         | Y         | Z         |
| C                                                                | -0.636247 | -1.284450 | -0.916867 |
| C                                                                | 0.832996  | -1.251470 | -0.467636 |
| C                                                                | 1.430578  | 0.091159  | -0.916830 |
| C                                                                | 0.667427  | 1.347075  | -0.467600 |
| C                                                                | -0.794111 | 1.193333  | -0.916862 |
| C                                                                | -1.500285 | -0.095579 | -0.467867 |
| H                                                                | 1.356077  | -2.037364 | -1.021364 |
| Cl                                                               | 1.083374  | -1.627637 | 1.243574  |
| H                                                                | 1.349472  | 0.086007  | -2.012409 |
| Cl                                                               | 3.165184  | 0.201676  | -0.576386 |
| H                                                                | -0.749033 | 1.125806  | -2.012446 |
| Cl                                                               | -1.757121 | 2.640266  | -0.576319 |
| Cl                                                               | -1.951767 | -0.124342 | 1.243204  |
| H                                                                | -2.442285 | -0.155593 | -1.021846 |
| H                                                                | 1.086547  | 2.193022  | -1.021288 |
| Cl                                                               | 0.868001  | 1.751903  | 1.243633  |
| Cl                                                               | -1.407835 | -2.841898 | -0.576308 |
| H                                                                | -0.600123 | -1.211752 | -2.012451 |

**Table S102** Optimized cartesian coordinates and total energies of *r-1, t-2, c-3, t-4, c-5, t-6-1eq, 2eq, 3eq, 4eq, 5eq, 6eq*-hexachlorocyclohexane.

| <i>r-1, t-2, c-3, t-4, c-5, t-6-1eq, 2eq, 3eq, 4eq, 5eq, 6eq</i> |           |           |           |
|------------------------------------------------------------------|-----------|-----------|-----------|
| <i>E(MP2/cc-pVTZ) = -2990.0269697 a.u.</i>                       |           |           |           |
| atom                                                             | X         | Y         | Z         |
| C                                                                | -0.794140 | 1.234355  | 0.220114  |
| C                                                                | 0.671920  | 1.304919  | -0.220118 |
| C                                                                | 1.466051  | 0.070563  | 0.220113  |
| C                                                                | 0.794140  | -1.234355 | -0.220114 |
| C                                                                | -0.671920 | -1.304919 | 0.220118  |
| C                                                                | -1.466051 | -0.070563 | -0.220113 |
| H                                                                | 1.569573  | 0.075546  | 1.311413  |
| Cl                                                               | 3.105687  | 0.149476  | -0.470001 |
| H                                                                | 0.719379  | 1.397070  | -1.311417 |
| Cl                                                               | 1.423424  | 2.764313  | 0.470027  |
| H                                                                | -0.719379 | -1.397070 | 1.311417  |
| Cl                                                               | -1.423423 | -2.764314 | -0.470027 |
| H                                                                | 0.850229  | -1.321524 | -1.311414 |
| Cl                                                               | 1.682334  | -2.614826 | 0.470031  |
| Cl                                                               | -3.105688 | -0.149475 | 0.470002  |
| H                                                                | -1.569573 | -0.075546 | -1.311413 |
| H                                                                | -0.850229 | 1.321524  | 1.311414  |
| Cl                                                               | -1.682336 | 2.614826  | -0.470031 |
